# Supplementary material
Source: PubMed Central journal article supplement (PMC8009274)
Supplement: NIHMS1679492-supplement-supplementary.pdf [file NIHMS1679492-supplement-supplementary.pdf]

# Self-Assembled Cage-like Receptor that Binds Biologically Relevant Dicarboxylic Acids via Proton Coupled Anion Recognition

Fei Wang,<sup>‡,†</sup> Sajal Sen,<sup>‡</sup> Chuang Chen,<sup>†</sup> Steffen Bähring,<sup>\*,†</sup> Chuanhu Lei,<sup>\*,†</sup> Zhiming Duan,<sup>†</sup> Zhan Zhang,<sup>\*,§</sup> Jonathan L. Sessler,<sup>\*,†,‡</sup> and Atanu Jana<sup>\*,†</sup>

<sup>‡</sup>School of Materials Science and Engineering, Shanghai University, Shanghai 200444, China

<sup>†</sup>Center for Supramolecular Chemistry and Catalysis and Department of Chemistry, College of Science, Shanghai University, Shanghai, 200444, P. R. China

<sup>§</sup>Key Laboratory of Catalysis and Energy Materials Chemistry of Ministry of Education & Hubei Key Laboratory of Catalysis and Materials Science, South-Central University for Nationalities, Wuhan, Hubei, 430074, China

<sup>†</sup>Department of Physics, Chemistry and Pharmacy, University of Southern Denmark, Campusvej 55, 5230, Odense M, Denmark

<sup>‡</sup>Department of Chemistry, The University of Texas at Austin, 105 East 24<sup>th</sup> Street Stop A 5300, Austin Texas 78712-1224, USA

## Table of Contents

### A. General Experimental Section

### B. Synthesis and Characterization

#### **I) Synthetic scheme for the 1,8-naphthyridine-based tetrapyrrolic receptor.**

#### **II) NMR spectra and MALDI TOF MS analyses for the compounds.**

a) <sup>1</sup>H NMR, <sup>13</sup>C NMR and MALDI-TOF mass spectra of all precursors and the final receptor **7**.

b) 600 MHz <sup>1</sup>H NMR spectroscopic titration results (full spectral range) of host **7** with oxalic acid, malonic acid, maleic acid, trifluoroacetic acid, 4,4'-biphenyldisulfonic acid (BPDSA), tetraphenylporphyrin tetrasulfonic acid (TPPTSA), HCl, H<sub>2</sub>SO<sub>4</sub>, fumaric acid, adipic acid, succinic acid, PTSA, acetic acid, propionic acid, and TBACl in THF-*d*<sub>8</sub> at 298 K.

- c) 600 MHz  $^1\text{H}$  NMR spectroscopic titration of host **7•7** with oxalic acid in the presence of 100 equiv of acetic acid in THF- $d_8$  at 298 K.
- d) 600 MHz  $^1\text{H}$  NMR spectroscopic titration results of host **7•7** with oxalic acid in the presence of presence of 100 equiv of fumaric acid in THF- $d_8$  at 298 K.
- e) Variable temperature 400 MHz  $^1\text{H}$  NMR spectroscopic titration results of host **7•7** with TBAF in THF- $d_8$  at 298 K.
- f) 600 MHz  $^1\text{H}$  NMR spectra of host **7•7** in various solvents under identical experimental conditions at 298 K.
- g) 600 MHz  $^1\text{H}$  NMR spectra of host in presence of 100 equiv of PTSA, HCl, and  $\text{H}_2\text{SO}_4$ , respectively, in THF- $d_8$  recorded under identical experimental conditions at 298 K.
- h) 600 MHz  $^1\text{H}$  DOSY NMR spectroscopic results of receptor **7•7**, and receptor **7•7** recorded in the presence of maleic acid, fumaric acid, and TBAF, respectively, in THF- $d_8$  at 298 K.

### **III) Additional Optical Studies**

- a) Absorption spectroscopic results: UV–Vis spectral studies of host **7•7** titrated with fumaric acid, adipic acid, succinic acid, acetic acid, propionic acid, BPDSA, TPPTSA, TFA, PTSA,  $\text{H}_2\text{SO}_4$ , HCl, and TBACl, respectively, in THF at 298 K.
- b) Emission spectroscopic results: Fluorescence spectral titration results of host **7•7** titrated with fumaric acid, adipic acid, succinic acid, acetic acid, propionic acid, BPDSA, TPPTSA, TFA, PTSA,  $\text{H}_2\text{SO}_4$ , HCl, and TBACl, respectively, in THF at 298 K.
- c) Isotherms created by fitting the data from selected fluorescence titration studies to standard 1:1 or statistical 1:2 binding equations.
- d) Fits of UV–Vis spectroscopic titration data for  $\text{H}_2\text{SO}_4$ .

### **IV) Single crystal X-ray structural analyses of the compounds**

- a) X-ray structure and table of crystal data, structure refinement of synthon **3**.
- b) X-ray structure and table of crystal data, structure refinement of receptor **7•7**.
- c) X-ray structure and table of crystal data, structure refinement of the host–guest

complex obtained between the supramolecular receptor **7.7** and maleic acid.

d) X-ray structure and table of crystal data, structure refinement of the host–guest complex obtained between the supramolecular receptor **7.7** and oxalic acid.

e) X-ray structure and table of crystal data, structure refinement of the host–guest complexation between supramolecular receptor **7.7** and malonic acid.

f) X-ray structure and table of crystal data, structure refinement of the host–guest complex obtained between the supramolecular receptor **7.7** and sulfuric acid.

## C. References

### A. General Experimental Section

**Materials.** Pd(OAc)<sub>2</sub>, Pd(PPh<sub>3</sub>)<sub>4</sub>, PPh<sub>3</sub>, K<sub>2</sub>CO<sub>3</sub>, ethylene glycol, I<sub>2</sub>, KI, NaHCO<sub>3</sub>, Na<sub>2</sub>S<sub>2</sub>O<sub>3</sub>, K<sub>2</sub>CO<sub>3</sub> and all the carboxylic and sulfonic acids used under present studies were purchased from Aldrich Chemical Co., Acros, TCI, Energy Chemical and Adamas-beta<sup>®</sup> and used as received. All anhydrous solvents were acquired either from Aldrich Chemical Co. or Adamas-beta<sup>®</sup> and used as received. All reactions were carried out under an argon atmosphere unless noted otherwise. Chromatographic separations were performed by using 100–200 mesh silica gel obtained from Merck. All solvents used for column chromatography were purchased from local suppliers and dried prior to use. Thin-layer chromatographic (TLC) analyses were carried out using silica gel pre-coated on glass sheets. Column chromatography was performed on silica gel (mesh size 200–300). Final separations of the compounds were performed by using a recycling preparative GPC from Japan Analytical Industries (JAI) using THF as the mobile phase.

**Instrumentation.** <sup>1</sup>H and <sup>13</sup>C NMR spectra were recorded using Bruker 600 MHz instruments in CDCl<sub>3</sub>, THF-*d*<sub>8</sub>, DMSO-*d*<sub>6</sub>, respectively, at 298 K. Chemical shifts are reported in ppm using tetramethylsilane (TMS) or residual solvent signals as the internal reference standards. MALDI-TOF mass spectrometric measurements were made using a Bruker (Autoflex speed) matrix-assisted laser desorption ionization time-of-flight mass spectrometer. Some compounds were analyzed by means of a Bruker Microflex 2 LRF 20

spectrometer using dithranol (1,8,9-trihydroxyanthracene) as the matrix. UV–Vis spectra were recorded in THF at 298 K using a Varian Cary 50 spectrophotometer. The concentration of all the entities was maintained at  $1 \times 10^{-5}$  M in THF. Emission spectra were recorded using a Hitachi spectrophotometer in THF at 298 K.

## B. Synthesis and Characterization

### D) Synthetic scheme for the 1,8-naphthyridine-based tetrapyrrolic receptor.

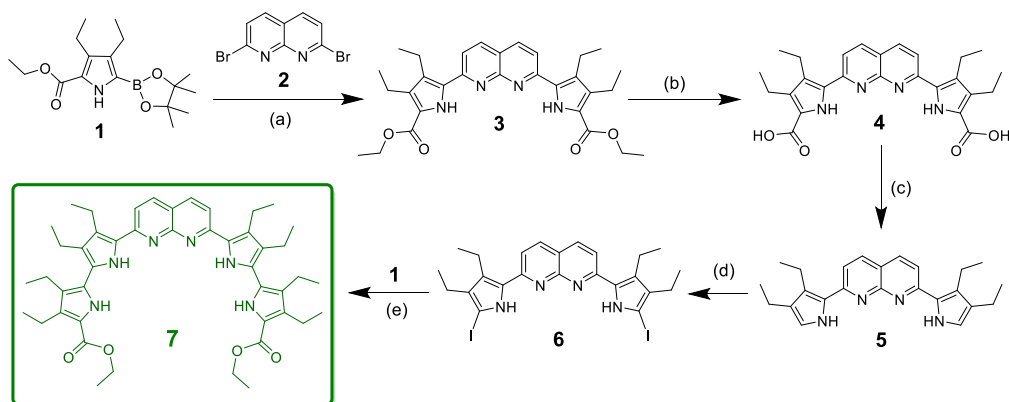

**Scheme S1.** Reagents, conditions, and range of yields: (a) Pd(OAc)<sub>2</sub>, PPh<sub>3</sub>, K<sub>2</sub>CO<sub>3</sub>, DMF/H<sub>2</sub>O, N<sub>2</sub>, reflux, 24 h, yields: 70%; (b) NaOH, EtOH/H<sub>2</sub>O, 85 °C, heat 5 h, 95%; (c) ethylene glycol, 185 °C, 50 min, yields: 91%; (d) I<sub>2</sub>/KI, NaHCO<sub>3</sub>, CH<sub>2</sub>Cl<sub>2</sub>/H<sub>2</sub>O, rt, 1 h, Na<sub>2</sub>S<sub>2</sub>O<sub>3</sub>, yields: 75%; (e) Pd(PPh<sub>3</sub>)<sub>4</sub>, K<sub>2</sub>CO<sub>3</sub>, DMF/H<sub>2</sub>O, reflux, 15 h, yields: 45%.

### Synthesis of compound 3

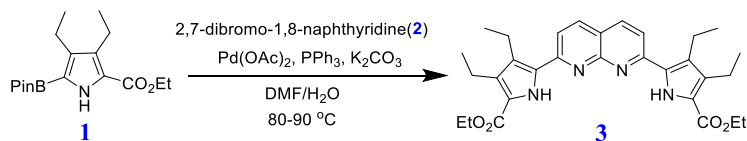

To a 20 mL round-bottom flask was added **1**<sup>S1</sup> (1 mmol), Pd(OAc)<sub>2</sub> (0.1 mmol), PPh<sub>3</sub> (0.2 mmol), and K<sub>2</sub>CO<sub>3</sub> (3.3 mmol) under an N<sub>2</sub> atmosphere. DMF (10 mL) and water (10 mL) were added through a syringe and the mixture was heated to 85 °C. **2** (1.2 mmol) was dissolved in 4 mL DMF and added via a syringe pump over the course of 1 h. The reaction was stirred at the same temperature for another 23 h. After the reaction mixture was cooled to r.t., the organic portion was extracted with CH<sub>2</sub>Cl<sub>2</sub> and washed with water

3 times. After removal of the solvents and other volatiles, the reaction mixture was purified by chromatography over silica gel (PE/EA, 10/1, v/v) to give **3** in the form of bright yellow crystals. Yield: 70%. <sup>1</sup>H NMR spectrum (600 MHz, CDCl<sub>3</sub>) δ: 10.26 (s, 2H, pyrrole NH), 8.15 (d, *J* = 8.1 Hz, 2H, naphthyridine CH), 7.78 (d, *J* = 8.4 Hz, 2H, naphthyridine CH), 4.51-4.22 (m, 4H, CH<sub>2</sub>), 2.85 (t, *J* = 7.4 Hz, 8H, pyrrole CH<sub>2</sub>), 1.41 (t, *J* = 7.3, 6.7 Hz, 6H, pyrrole CH<sub>3</sub>), 1.28 (t, *J* = 7.5 Hz, 6H, pyrrole CH<sub>3</sub>), 1.21 (t, *J* = 7.4 Hz, 6H, CH<sub>3</sub>). <sup>13</sup>C NMR spectrum (150 MHz, CDCl<sub>3</sub>) δ: 160.8, 155.7, 153.5, 137.5, 134.8, 129.5, 127.7, 120.4, 120.1, 119.0, 60.1, 18.2, 17.9, 15.9, 15.8, 14.6. MALDI-TOF MS Calcd for C<sub>30</sub>H<sub>36</sub>N<sub>4</sub>O<sub>4</sub>: 516.642; Found: 517.400 [M + H]<sup>+</sup>.

#### Synthesis of compound 4

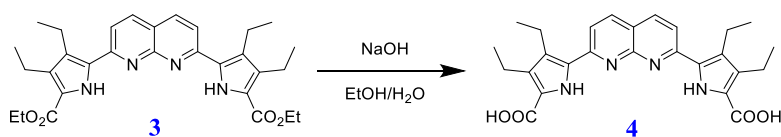

Compound **4** was synthesized by following the published literature method.<sup>S2</sup> Typically, this has been done by taking the mixture of **3** (1 mmol), sodium hydroxide (6 mmol), ethanol (25 ml), and water (12.5 ml) in a 250 mL two-necked round bottom flask, stirred at 85 °C under an N<sub>2</sub> atmosphere for 5 h. After cooling under N<sub>2</sub>, HCl aqueous was added dropwise to the reaction mixture until it turned acidic (pH = 1). The white precipitates were filtered, washed with water, and then dried under vacuum. This gave the product **4** in the form of yellowish-brown solid. Yield: 95%. <sup>1</sup>H NMR (600 MHz, DMSO-*d*<sub>6</sub>) δ: 12.56 (s, 2H, -COOH), 11.48 (s, 2H, pyrrole NH), 8.36 (d, *J* = 8.5 Hz, 2H, naphthyridine CH), 8.11 (d, *J* = 8.5 Hz, 2H, naphthyridine CH), 2.98 (t, *J* = 7.1 Hz, 4H, pyrrole CH<sub>2</sub>), 2.77 (t, *J* = 7.2 Hz, 4H, pyrrole CH<sub>2</sub>), 1.24 (t, *J* = 7.3 Hz, 6H, pyrrole CH<sub>3</sub>), 1.14 (t, *J* = 7.4 Hz, 6H, pyrrole CH<sub>3</sub>). <sup>13</sup>C NMR spectrum (150 MHz, DMSO-*d*<sub>6</sub>) δ: 162.6, 155.6, 154.3, 137.6, 133.6, 130.6, 128.7, 120.9, 119.9, 119.6, 18.3, 17.9, 16.6, 16.3. MALDI-TOF MS Calcd for C<sub>26</sub>H<sub>28</sub>N<sub>4</sub>O<sub>4</sub>: 460.534; Found: 461.148 [M + H]<sup>+</sup>.

## Synthesis of compound 5

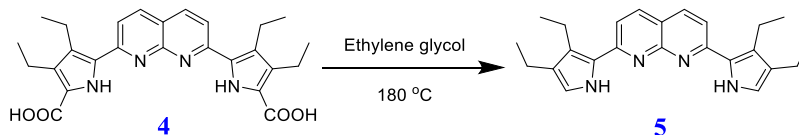

The dicarboxylic acid **4** was suspended in ethylene glycol (30 ml) and then heated at 180 °C for 50 min with stirring under an N<sub>2</sub> atmosphere. After cooling under N<sub>2</sub>, cold water was added to cause precipitation of the decarboxylated product. Filtration and then drying under vacuum afforded **5** as a green powder. Yield: 91%. <sup>1</sup>H NMR (600 MHz, CDCl<sub>3</sub>) δ: 9.93 (s, 2H, pyrrole NH), 7.97 (d, *J* = 8.5 Hz, 2H, naphthyridine CH), 7.62 (d, *J* = 8.5 Hz, 2H, naphthyridine CH), 6.74 (s, 2H, pyrrole α-H), 2.85 (t, *J* = 7.6 Hz, 4H, pyrrole CH<sub>2</sub>), 2.52 (t, *J* = 7.5 Hz, 4H, pyrrole CH<sub>2</sub>), 1.28 (t, *J* = 7.6 Hz, 6H, pyrrole CH<sub>3</sub>), 1.25 (t, *J* = 7.5 Hz, 6H, pyrrole CH<sub>3</sub>). <sup>13</sup>C NMR (150 MHz, CDCl<sub>3</sub>) δ: 156.1, 153.9, 136.8, 127.3, 126.9, 126.4, 118.6, 117.9, 117.5, 18.6, 18.2, 15.5, 14.8. MALDI-TOF MS Calcd for C<sub>24</sub>H<sub>28</sub>N<sub>4</sub>: 372.516; Found: 373.356 [M + H]<sup>+</sup>.

## Synthesis of compound 6

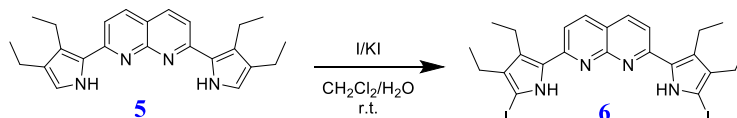

To a solution of **5** (1 mmol) in 10 mL CH<sub>2</sub>Cl<sub>2</sub>, was added NaHCO<sub>3</sub> (4.6 mmol in 10 mL H<sub>2</sub>O). An aqueous mixture of I<sub>2</sub> (1.5 mmol) and KI (3 mmol) was then added dropwise to the reaction mixture at r.t. The contents of the reaction vessel were stirred for another 1 h before the reaction was quenched with Na<sub>2</sub>S<sub>2</sub>O<sub>3</sub>. Column chromatographic separation of the crude product over silica gel using PE/CH<sub>2</sub>Cl<sub>2</sub> (2/1, v/v) as eluent yielded the pure product **6**<sup>S3</sup> as brown crystalline material. Yield: 65%. <sup>1</sup>H NMR (600 MHz, CDCl<sub>3</sub>) δ: 9.85 (s, 2H, pyrrole NH), 8.01 (d, *J* = 8.1 Hz, 2H, naphthyridine CH), 7.59 (d, *J* = 8.4 Hz, 2H, naphthyridine CH), 2.86 (t, *J* = 7.6 Hz, 4H, pyrrole CH<sub>2</sub>), 2.45 (t, *J* = 7.5 Hz, 4H,

pyrrole CH<sub>2</sub>), 1.27 (t, *J* = 7.6 Hz, 6H, pyrrole CH<sub>3</sub>), 1.13 (t, *J* = 7.5 Hz, 6H, pyrrole CH<sub>3</sub>). <sup>13</sup>C NMR (150 MHz, CDCl<sub>3</sub>) δ: 151.7, 136.1, 131.0, 130.1, 127.5, 127.4, 126.5, 118.1, 116.2, 28.7, 18.9, 18.2, 14.7, 14.7. MALDI-TOF MS Calcd for C<sub>24</sub>H<sub>26</sub>I<sub>2</sub>N<sub>4</sub>: 624.309; Found: 625.266 [M + H]<sup>+</sup>.

### Synthesis of receptor 7

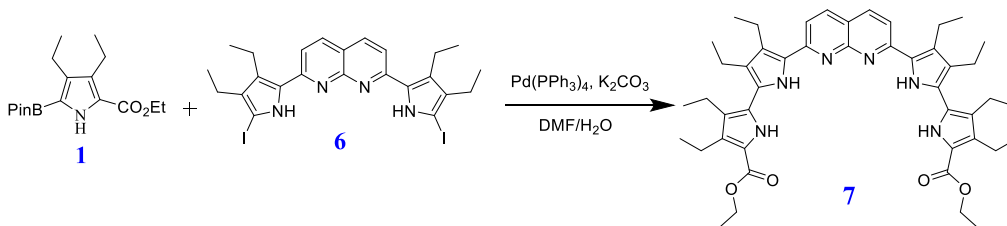

A mixture of **6** (0.5 mmol), Pd(PPh<sub>3</sub>)<sub>4</sub> (0.025 mmol), and K<sub>2</sub>CO<sub>3</sub> (2.5 mmol) was suspended in 10 mL DMF and 5 mL water and the reaction was heated to 75 °C under an N<sub>2</sub> atmosphere. **1** (1.2 mmol) was dissolved in 4 mL DMF and added via a syringe pump over the course of 1 h. The reaction was stirred at the same temperature for another 14 h. After the reaction mixture was cooled to r.t., water was added. The organic layer was extracted with CH<sub>2</sub>Cl<sub>2</sub> and washed with water 3 times. After removal of the solvent, the reaction mixture was purified by silica gel chromatography using PE/EA, 20:1 (v/v) as eluent yielded **7** as light yellow solid. Yield: 45%. <sup>1</sup>H NMR spectrum (600 MHz, CDCl<sub>3</sub>) δ: 9.80 (s, 2H, pyrrole NH), 8.76 (s, 2H, pyrrole NH), 8.01 (d, *J* = 8.4 Hz, 2H, naphthyridine CH), 7.67 (d, *J* = 8.5 Hz, 2H, naphthyridine CH), 4.32 (t, *J* = 7.1 Hz, 4H, CH<sub>2</sub>), 2.89 (t, *J* = 7.5 Hz, 4H, pyrrole CH<sub>2</sub>), 2.80 (t, *J* = 7.4 Hz, 4H, pyrrole CH<sub>2</sub>), 2.52 (t, *J* = 7.7 Hz, 8H, pyrrole CH<sub>2</sub>), 1.36 (t, *J* = 7.2 Hz, 6H, pyrrole CH<sub>3</sub>), 1.31 (t, *J* = 7.5 Hz, 6H, pyrrole CH<sub>3</sub>), 1.21 (t, *J* = 7.4 Hz, 6H, pyrrole CH<sub>3</sub>), 1.12 (t, *J* = 7.5 Hz, 6H, pyrrole CH<sub>3</sub>), 1.08 (t, *J* = 7.5 Hz, 6H, CH<sub>3</sub>). <sup>13</sup>C NMR spectrum (150 MHz, CDCl<sub>3</sub>): δ: 161.3, 155.9, 153.4, 136.8, 133.6, 127.5, 127.1, 126.8, 125.9, 124.7, 122.9, 118.9, 118.3, 117.6, 59.8, 18.8, 18.4, 17.8, 17.7, 16.4, 16.1, 15.8, 15.7, 14.45. MALDI-TOF MS Calcd for C<sub>26</sub>H<sub>28</sub>N<sub>4</sub>O<sub>4</sub>: 759.008; Found: 759.384 [M]<sup>+</sup>.

## II) NMR and MALDI TOF MS analyses for the compounds

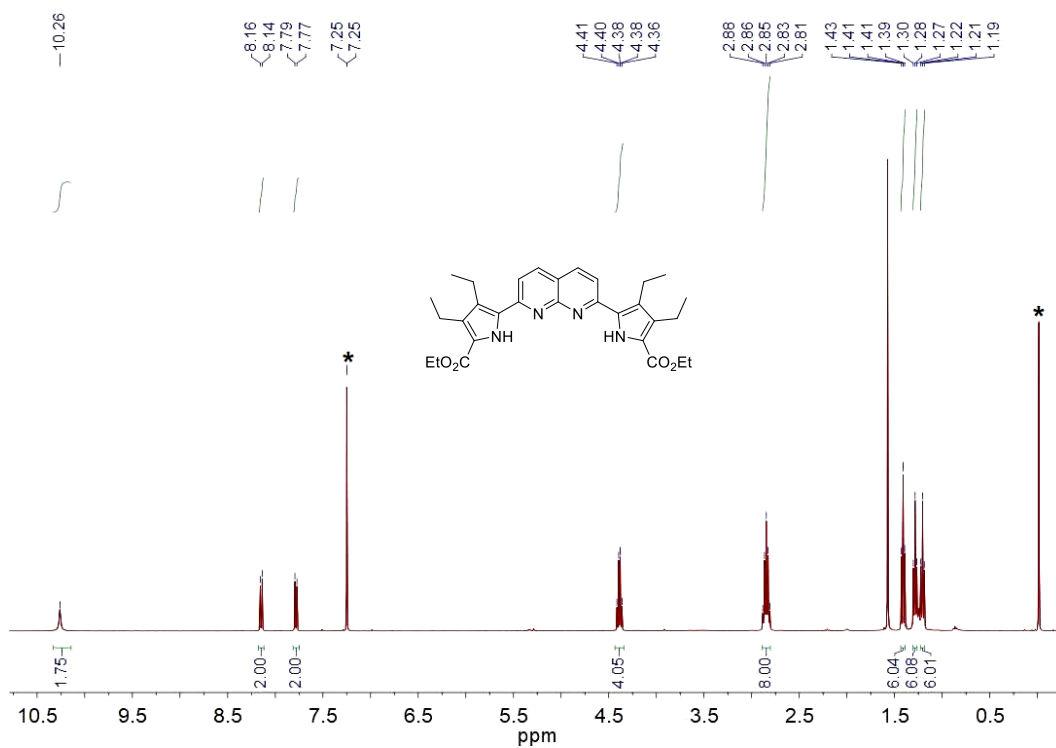

Figure S1. <sup>1</sup>H NMR (600 MHz, CDCl<sub>3</sub> at 298 K) spectrum of **3**.

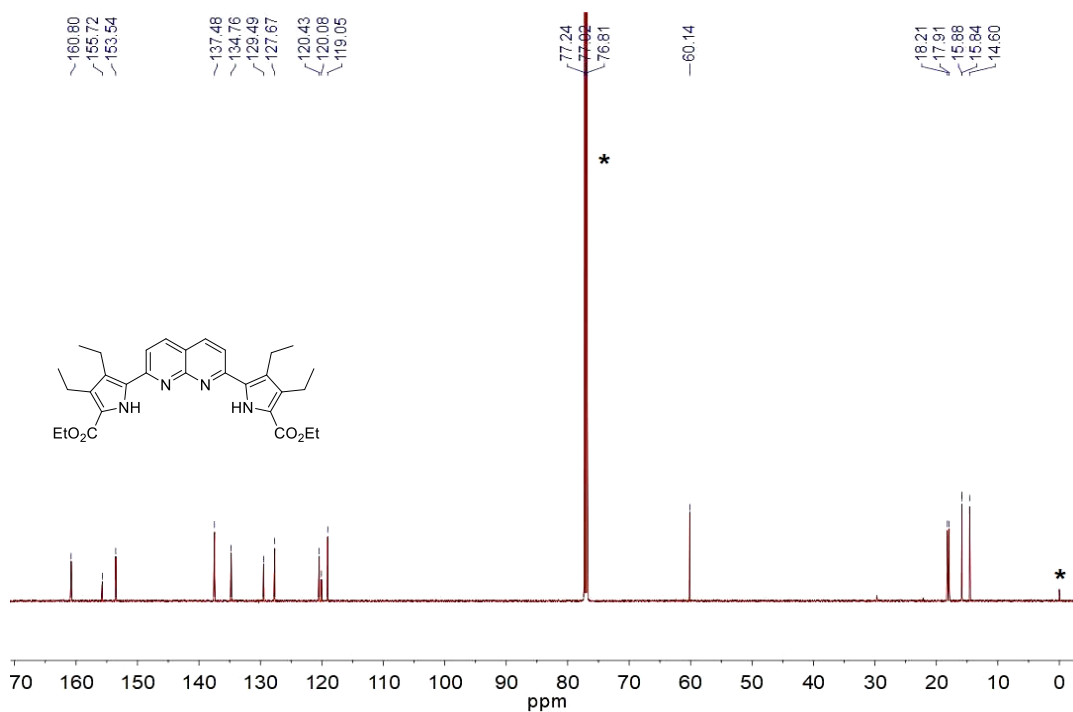

Figure S2. <sup>13</sup>C NMR (150 MHz, CDCl<sub>3</sub> at 298 K) spectrum of **3**.



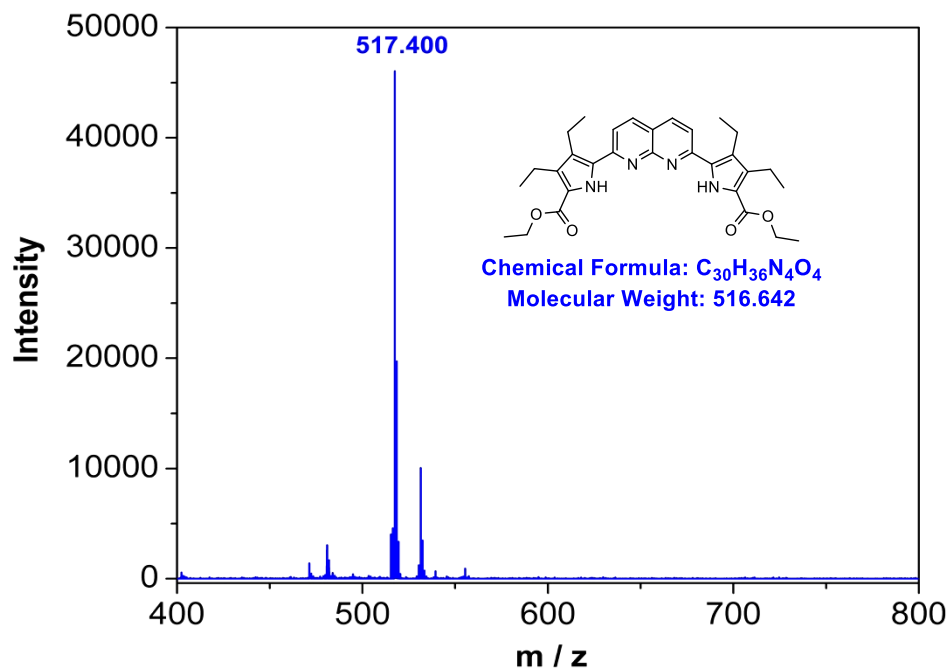

Figure S3. MALDI-TOF MS of compound 3.

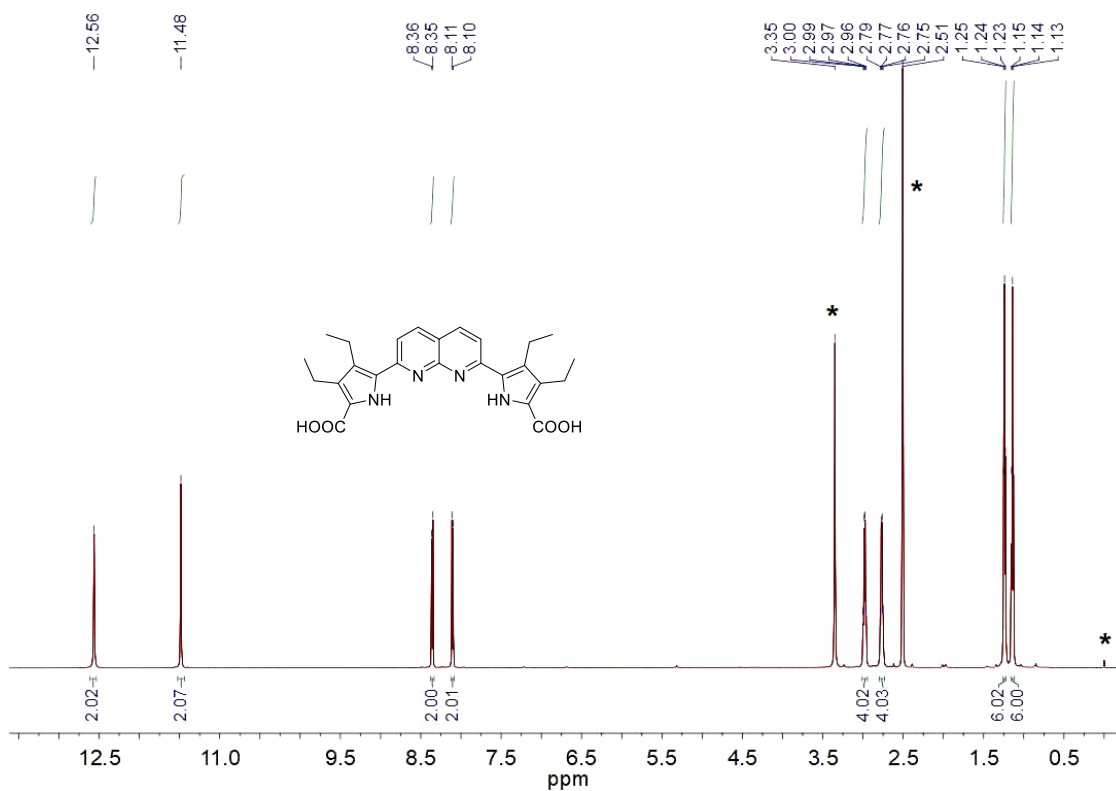

Figure S4.  $^1H$  NMR (600 MHz,  $DMSO-d_6$  at 298 K) spectrum of 4.

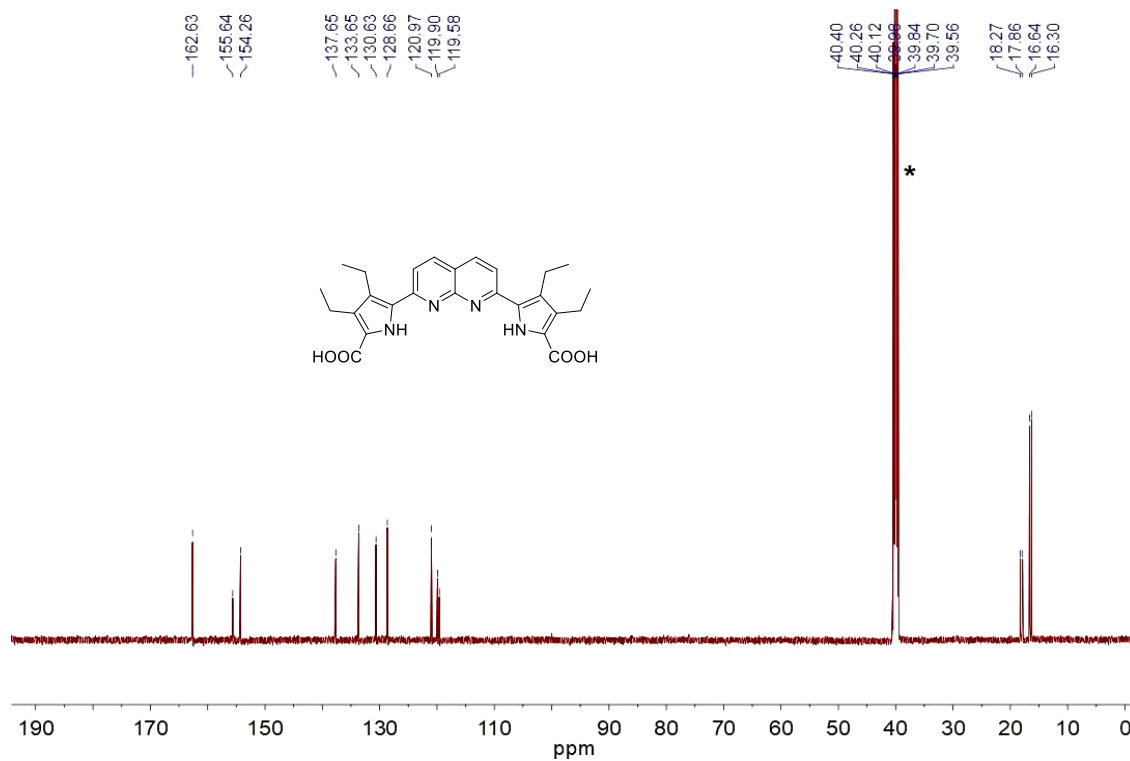

Figure S5. <sup>13</sup>C NMR (150 MHz, DMSO-*d*<sub>6</sub> at 298 K) spectrum of 4.

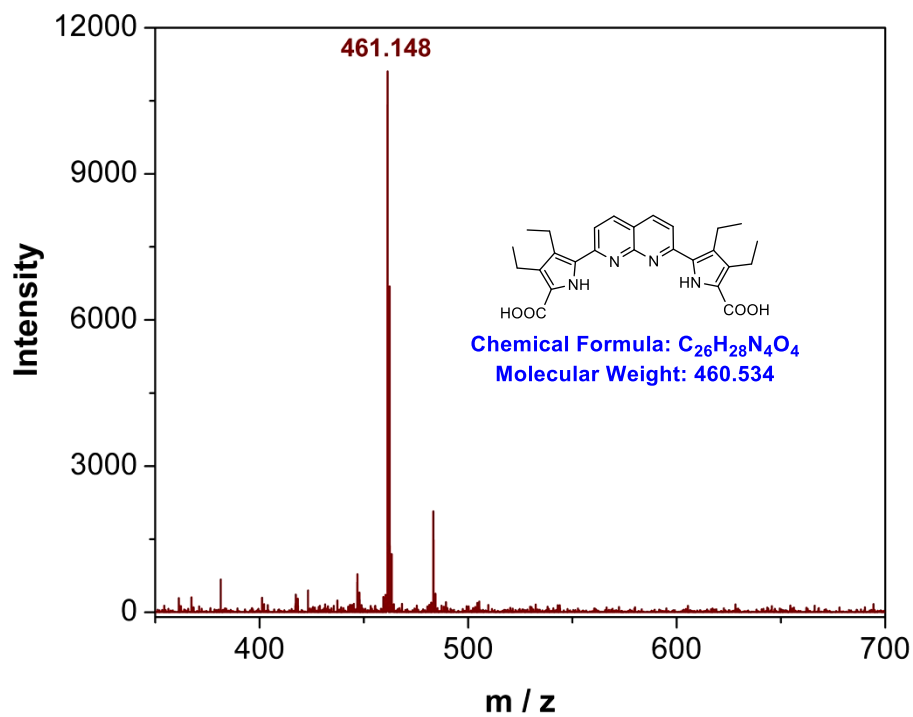

Figure S6. MALDI-TOF MS of compound 4.

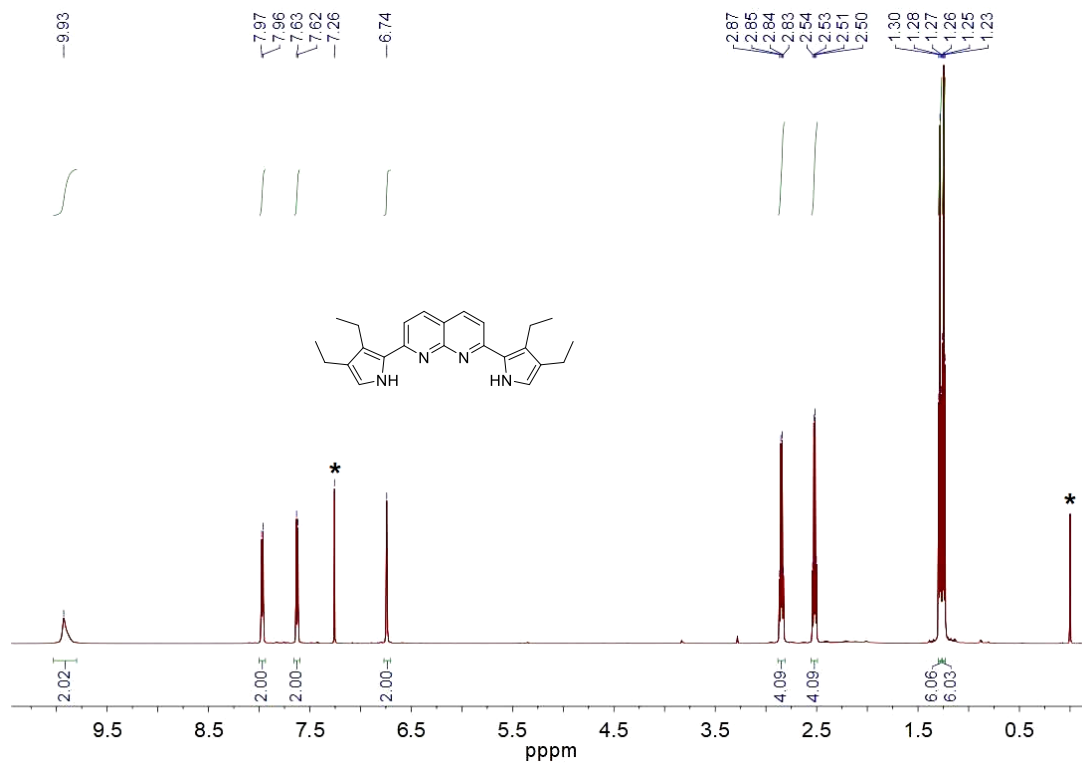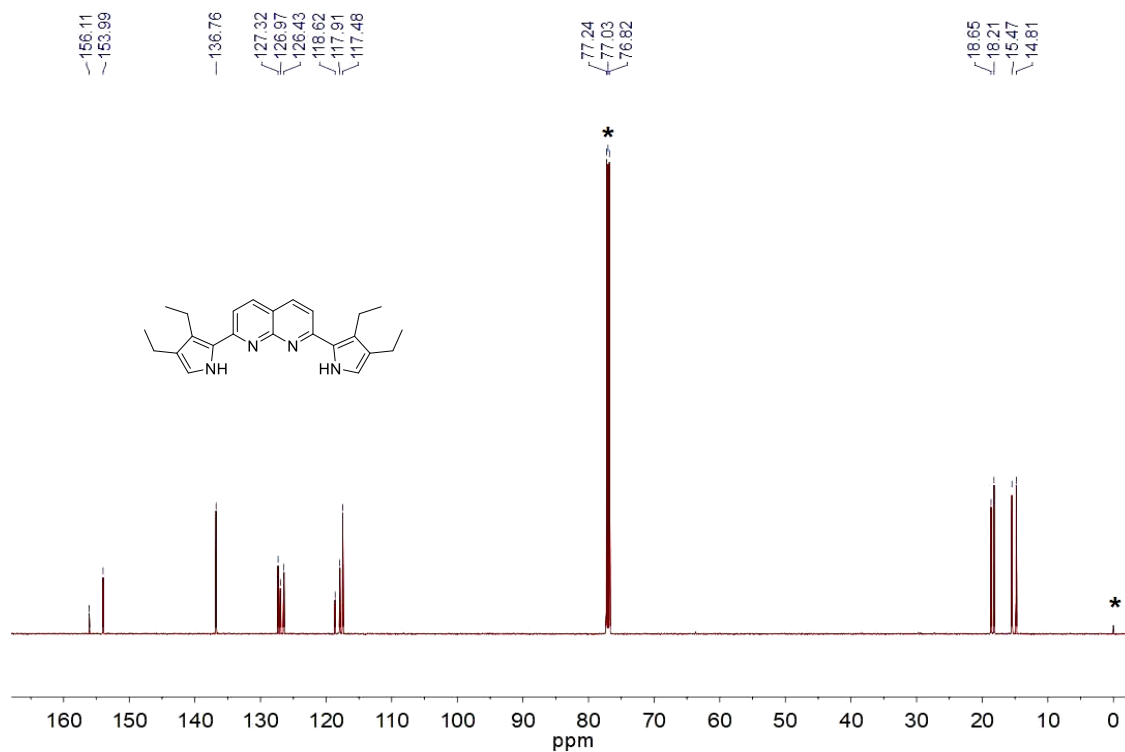

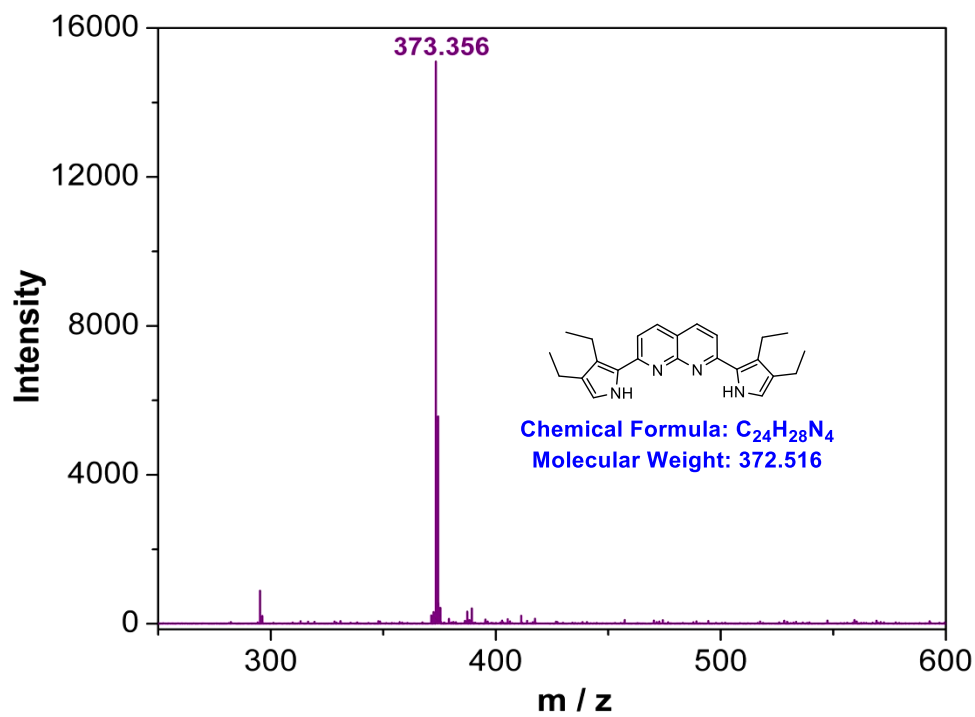

**Figure S9.** MALDI-TOF MS of compound **5**.

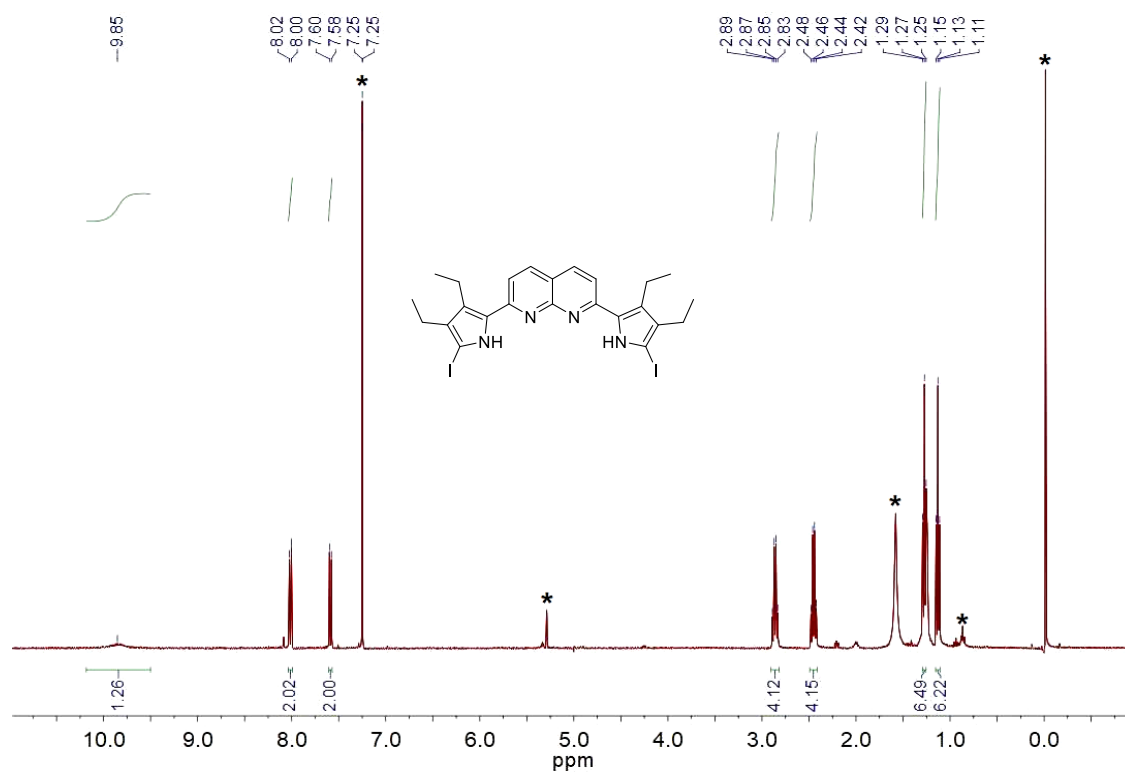

**Figure S10.**  $^1H$  NMR (600 MHz,  $CDCl_3$  at 298 K) spectrum of **6**.

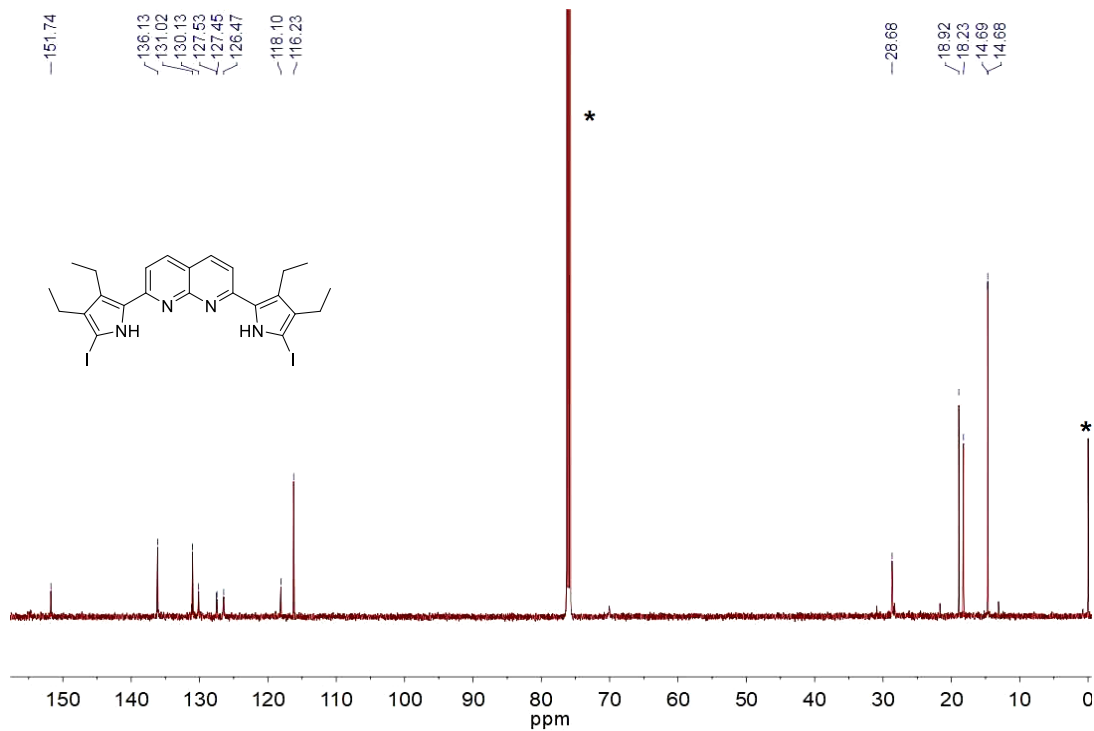

**Figure S11.** <sup>13</sup>C NMR (150 MHz, CDCl<sub>3</sub> at 298 K) spectrum of 6.

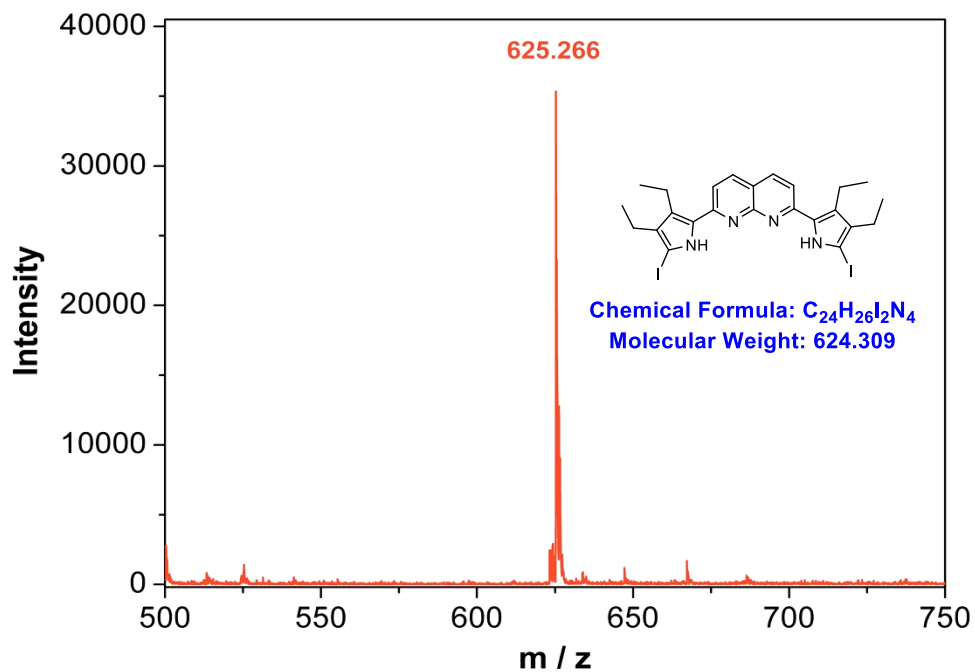

**Figure S12.** MALDI-TOF MS of compound 6.

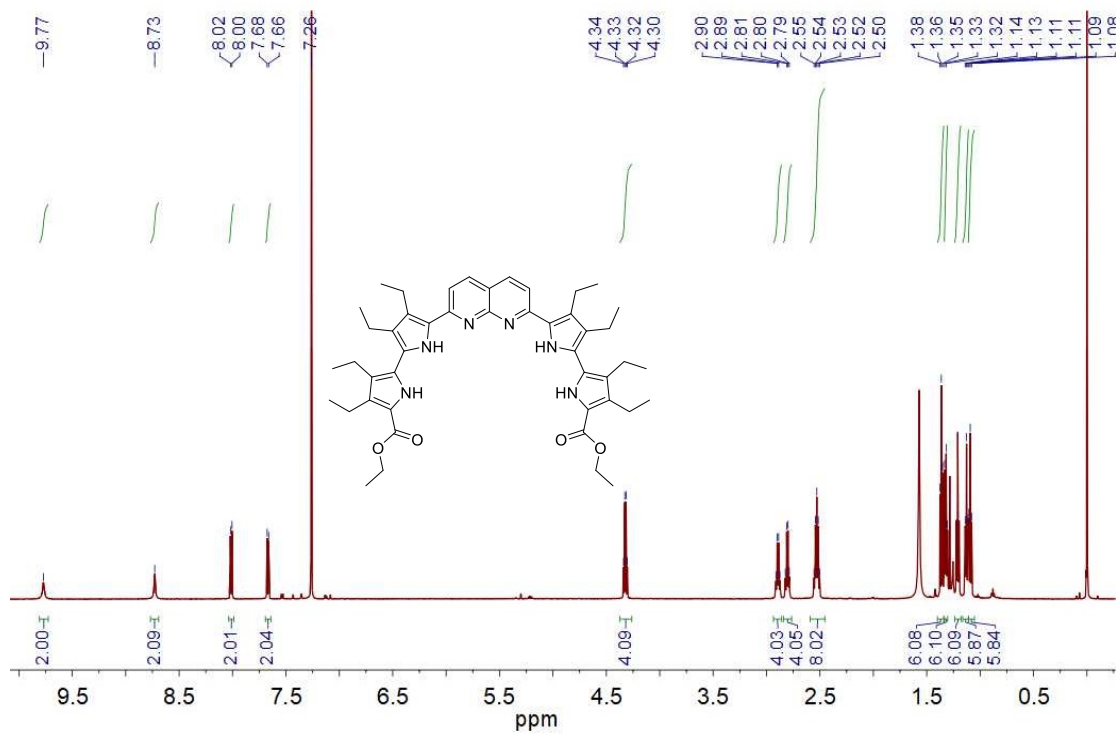

**Figure S13.**  $^1\text{H}$  NMR (600 MHz,  $\text{CDCl}_3$  at 298 K) spectrum of 7.

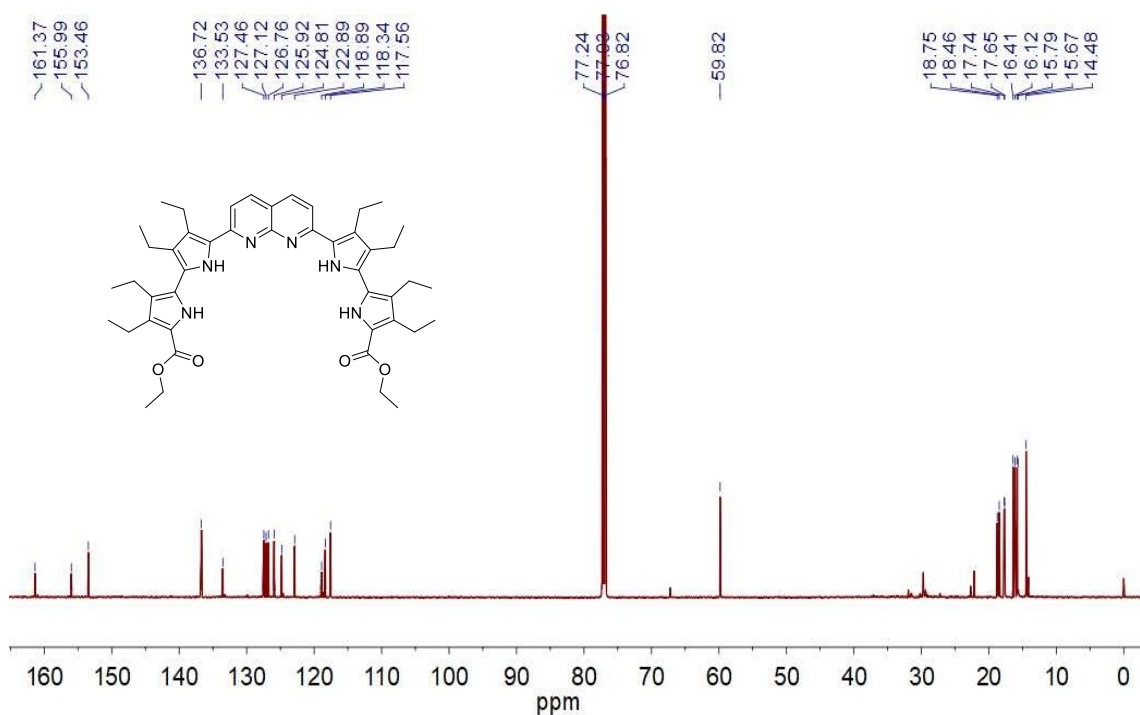

**Figure S14.**  $^{13}\text{C}$  NMR (150 MHz,  $\text{CDCl}_3$  at 298 K) spectrum of 7.

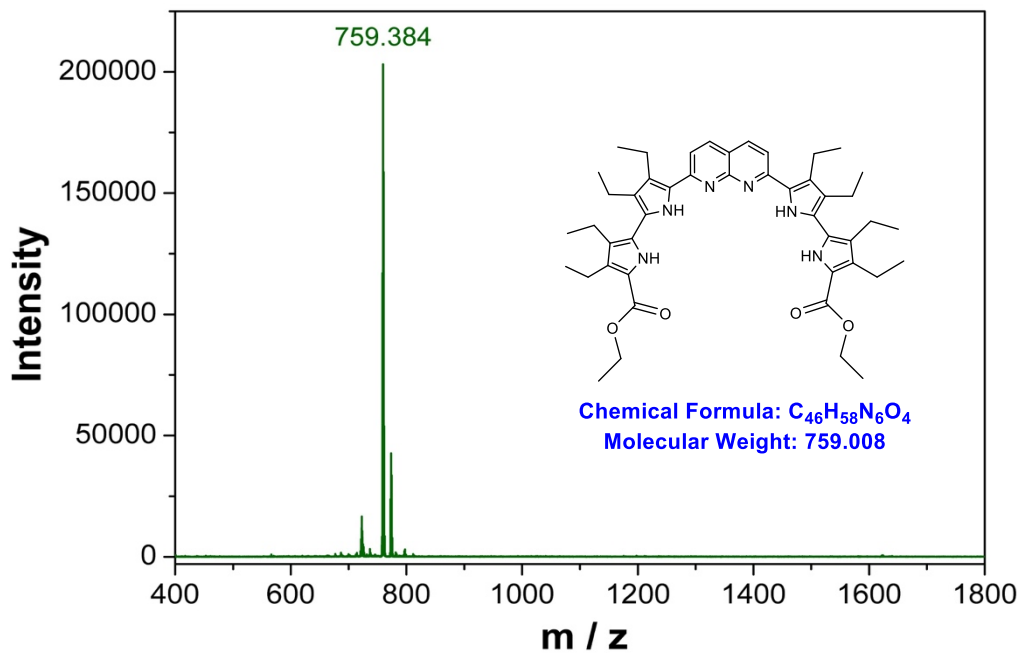

**Figure S15.** MALDI-TOF MS of final receptor unit **7**.

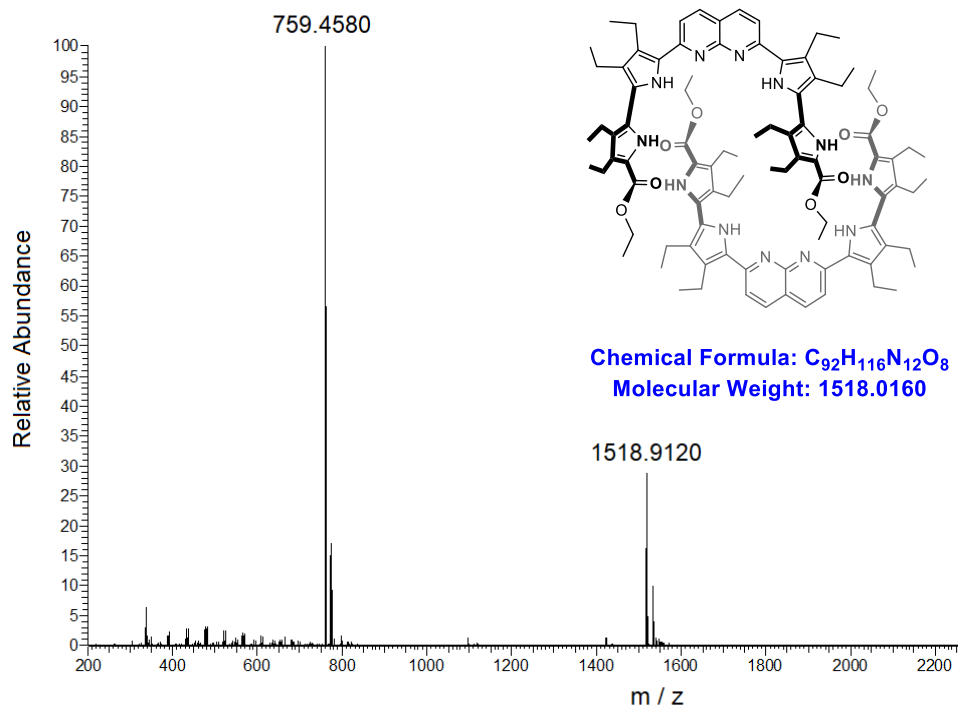

**Figure S16.** ESI-TOF MS of the receptor, showing ' $m/z$ ' corresponding to the hydrogen-bonded dimeric macrocyclic species **7.7**.

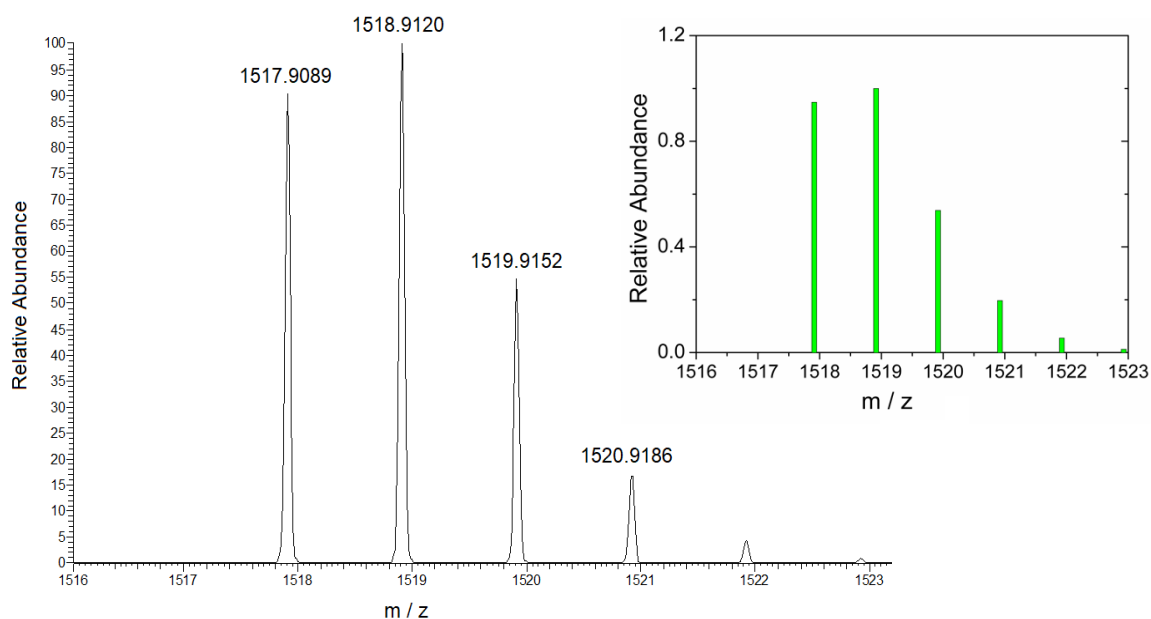

**Figure S17.** Isotopic distribution pattern of the dimeric macrocyclic receptor **7.7** predicted by ESI-TOF MS, considering  $(M+1)^+$ . **Inset:** Green bars represent the simulated version of isotopic distribution pattern of receptor **7.7**.

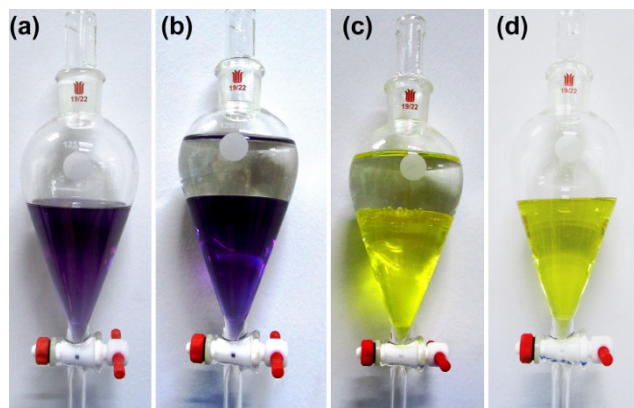

**Figure S18.** Pictorial demonstration of the aqueous extraction involving receptor **7.7** and oxalic acid. The organic ( $\text{CH}_2\text{Cl}_2$ ) part containing supramolecular ensemble (a); the **undisturbed** organic and aqueous parts before aqueous wash up (b); **washed** organic part after aqueous extraction where the oxalic acid goes to the aqueous layer and the receptor goes to the  $\text{CH}_2\text{Cl}_2$  phase (c); the organic phase with **pristine host** only (d).



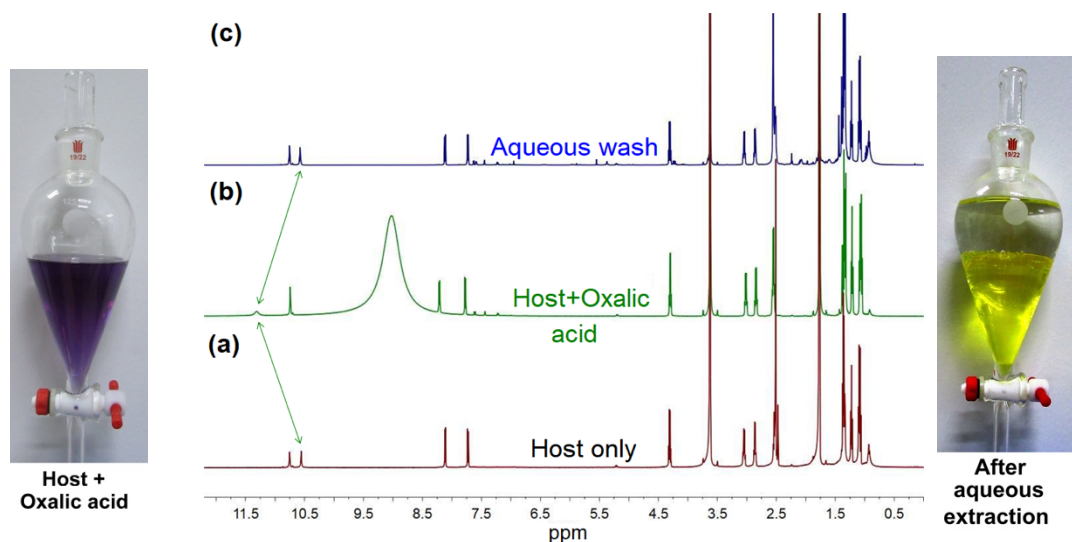

**Figure S19.** Comparative  $^1\text{H}$  NMR (600 MHz,  $\text{THF-}d_8$  at 298 K) spectra of pristine receptor **7.7** (a), with oxalic acid (b), and the organic phase after aqueous extraction (c). The spectrum (c) reveals that the guest removed from **7.7** upon aqueous extraction, which gives similar spectroscopic signature as pristine host, **7.7** (a).

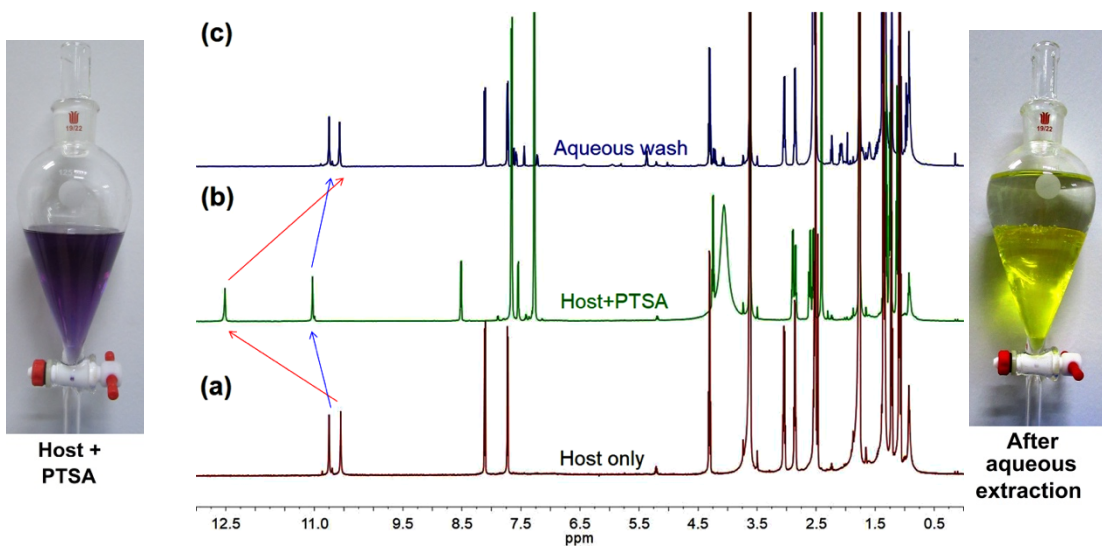

**Figure S20.**  $^1\text{H}$  NMR (600 MHz,  $\text{THF-}d_8$  at 298 K) spectra of pristine receptor **7.7** (a), with PTSA (b), and the organic phase after aqueous extraction (c). The spectrum (c) reveals that the supramolecular receptor releases PTSA upon aqueous wash.

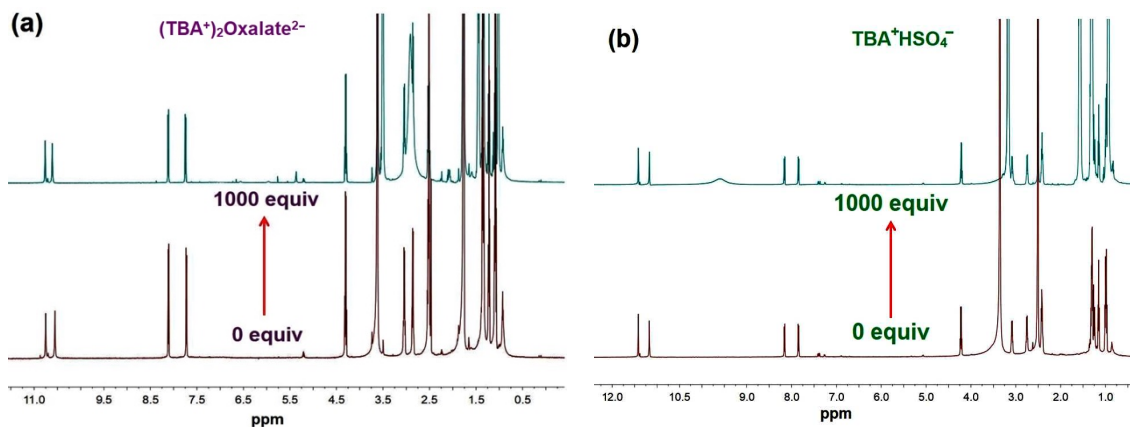

**Figure S21.**  $^1\text{H}$  NMR (600 MHz at 298 K) spectra of receptor **7.7** recorded in the presence of 1000 equiv of tetrabutylammonium oxalate in  $\text{THF-}d_8$  (a), and tetrabutylammonium hydrogen sulfate in  $\text{DMSO-}d_6$  (b), respectively.

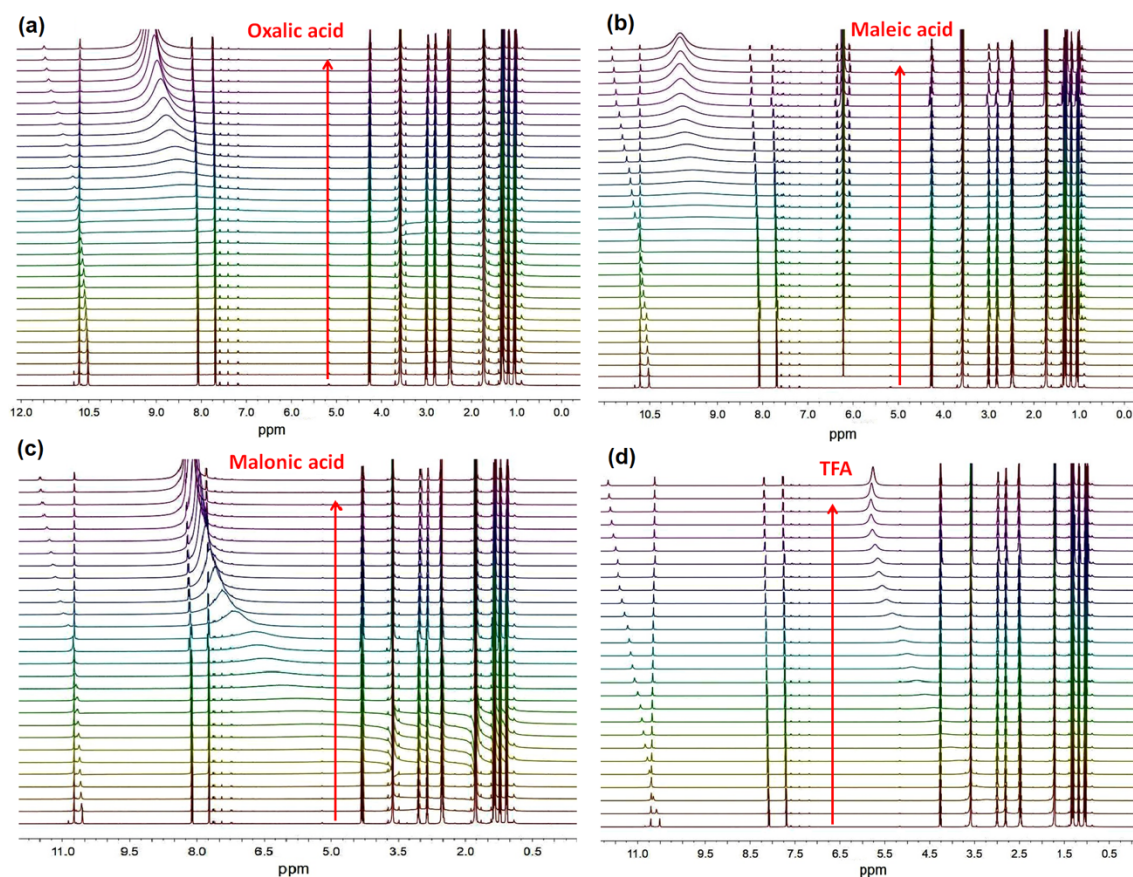

**Figure S22.** (a–d)  $^1\text{H}$  NMR (600 MHz,  $\text{THF-}d_8$  at 298 K) spectroscopic titration results of host **7.7** against 100 equiv of oxalic acid, maleic acid, malonic acid, and against 10 equiv of TFA, respectively.

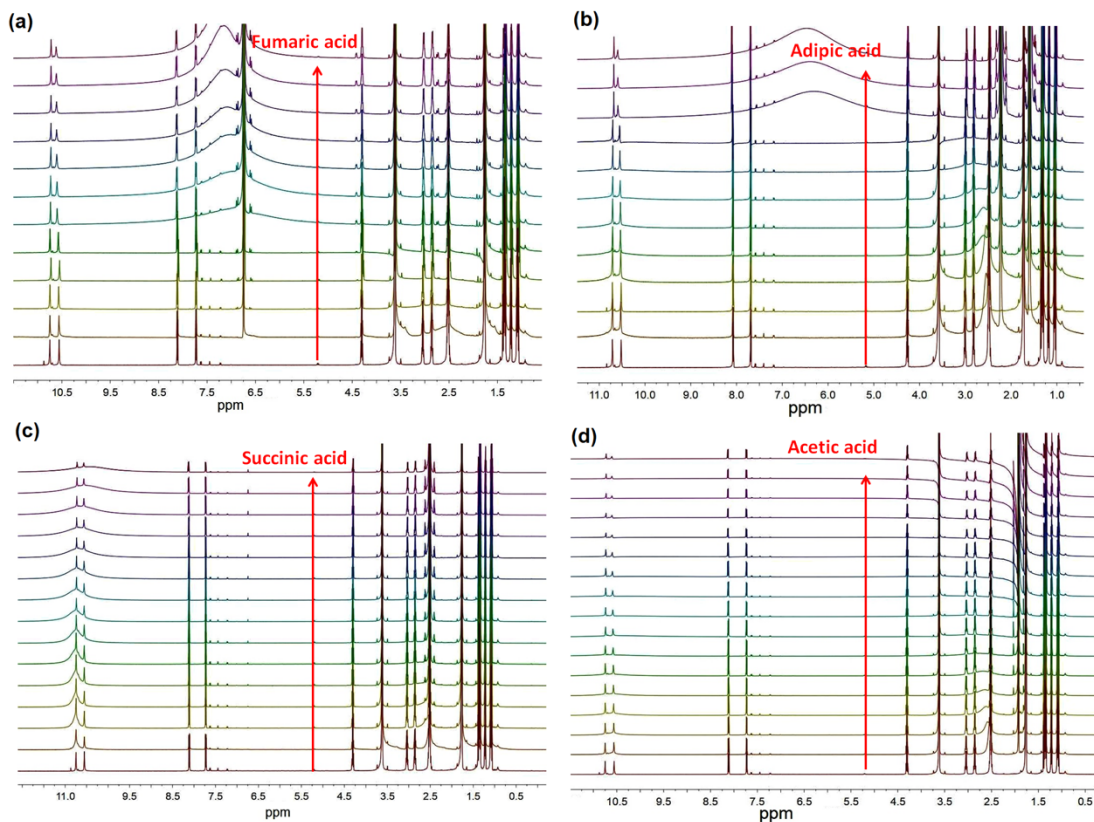

**Figure S23.** (a–d)  $^1\text{H}$  NMR (600 MHz,  $\text{THF-}d_8$  at 298 K) spectroscopic titration results of host **7.7** against 100 equiv fumaric acid, adipic acid, succinic acid, and acetic acid, respectively.

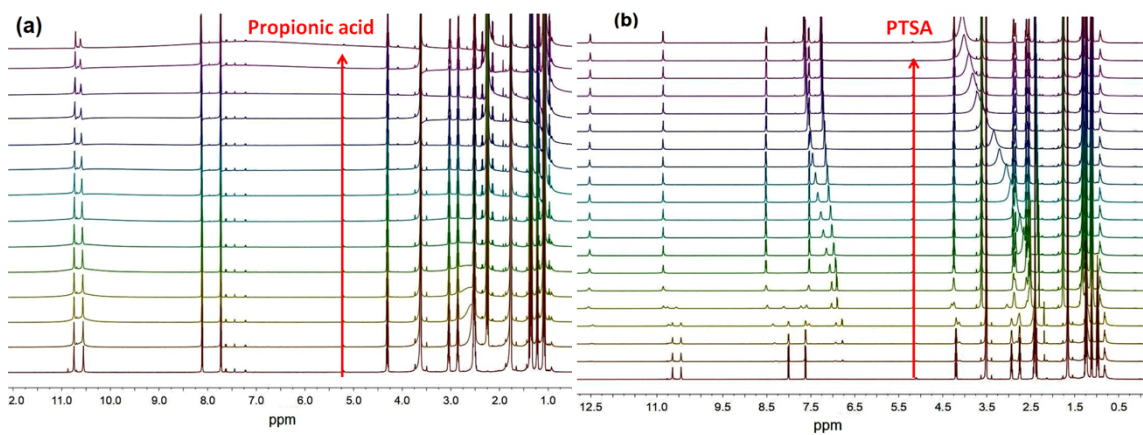

**Figure S24.**  $^1\text{H}$  NMR (600 MHz,  $\text{THF-}d_8$  at 298 K) spectroscopic titration results of host **7.7** against 100 equiv propionic acid (a), and vs 10 equiv PTSA (b), respectively.

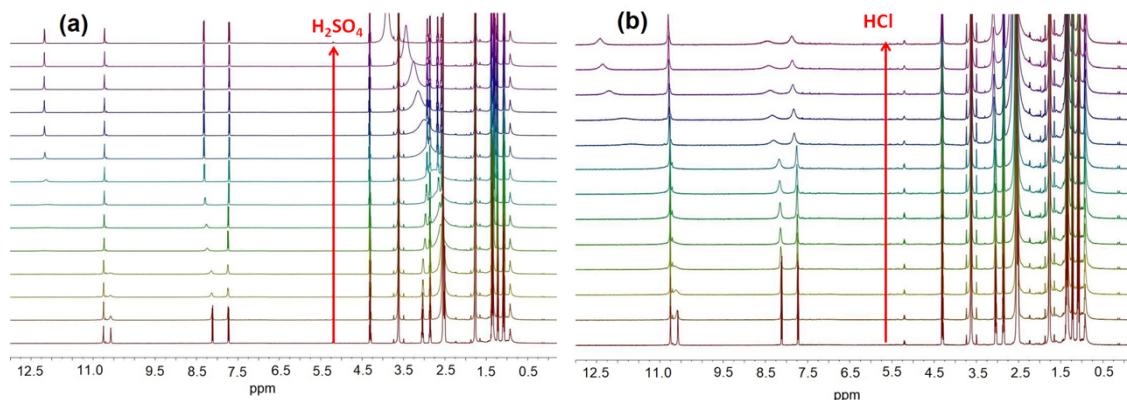

**Figure S25.** <sup>1</sup>H NMR (600 MHz, THF-*d*<sub>8</sub> at 298 K) spectroscopic titration results of host 7.7 against 10 equiv of sulfuric acid (a), and 10 equiv of HCl (b), respectively.

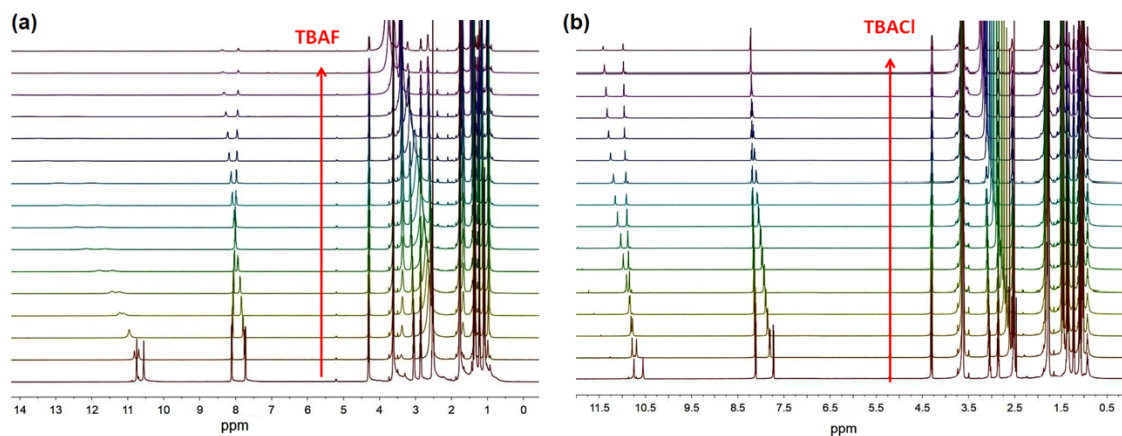

**Figure S26.** <sup>1</sup>H NMR (600 MHz, THF-*d*<sub>8</sub> at 298 K) spectroscopic titration results of host 7.7 against 20 equiv of TBAF (a), and 50 equiv of TBACl (b), respectively.

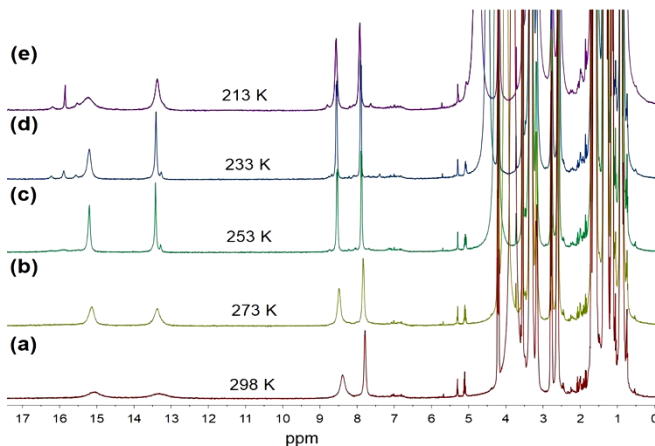

**Figure S27.** (a–e) Variable temperature <sup>1</sup>H NMR (400 MHz in THF-*d*<sub>8</sub>) spectra of host 7.7 against TBAF. The signal at 15.85 ppm corresponds to the generation of HF<sub>2</sub><sup>-</sup>, which is visible at 233 K (d), and 213 K (e), respectively.

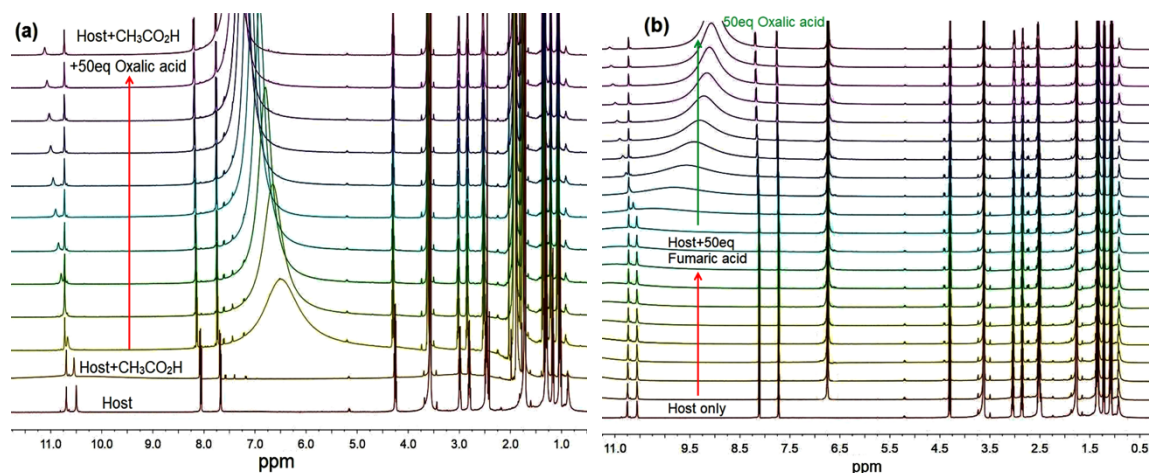

**Figure S28.** Competitive experiments in the presence of a large excess of one component: Representative acids from mono- (acetic acid) and di-acids (fumaric acid) were taken for this purpose. <sup>1</sup>H NMR (600 MHz, THF-*d*<sub>8</sub> at 298 K) spectroscopic titration results of host **7.7** against oxalic acid in the presence of 100 equiv of acetic acid (a), and the titration result of host **7.7** against oxalic acid in the presence of 100 equiv of fumaric acid (b), respectively.

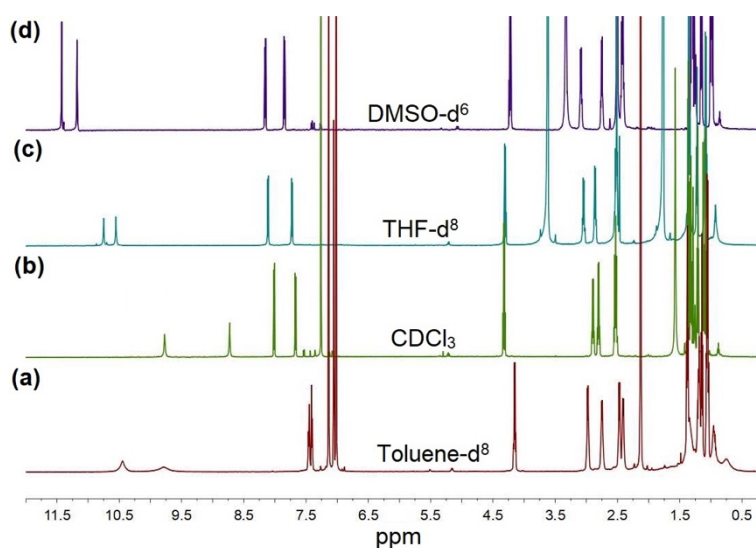

**Figure S29.** (a–d) Solvent dependent <sup>1</sup>H NMR (600 MHz at 298 K) spectra of host **7.7** in toluene-*d*<sub>8</sub> (a), CDCl<sub>3</sub> (b), THF-*d*<sub>8</sub> (c), and DMSO-*d*<sub>6</sub> (d), respectively, under identical experimental conditions.

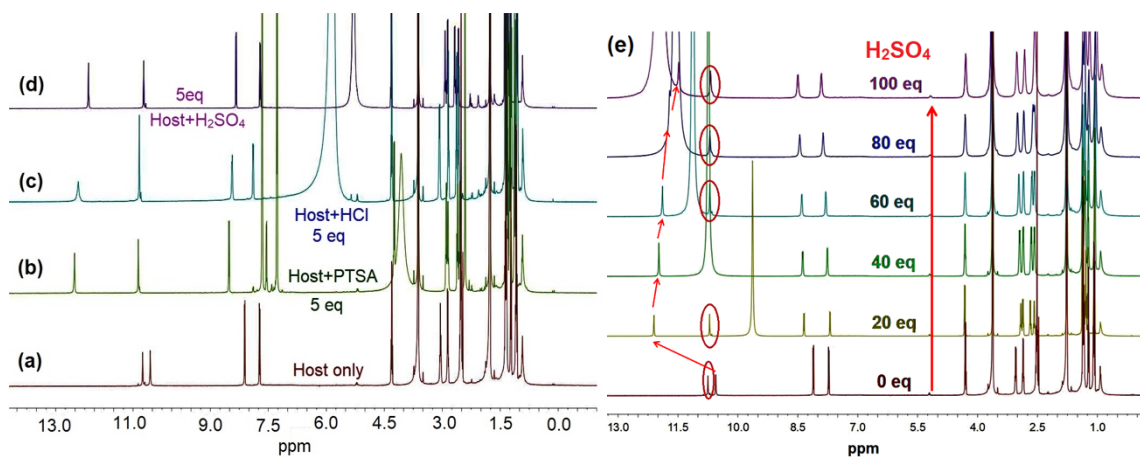

**Figure S30.** (a–d)  $^1\text{H}$  NMR (600 MHz,  $\text{THF-}d_8$  at 298 K) spectra of host **7.7** (a); in the presence of 5 equiv of PTSA (b) 5 equiv of HCl (c) and 5 equiv of  $\text{H}_2\text{SO}_4$  (d), respectively. (e)  $^1\text{H}$  NMR (600 MHz,  $\text{THF-}d_8$  at 298 K) titration result with host **7.7** upon incremental addition of up to 100 equiv of  $\text{H}_2\text{SO}_4$ .

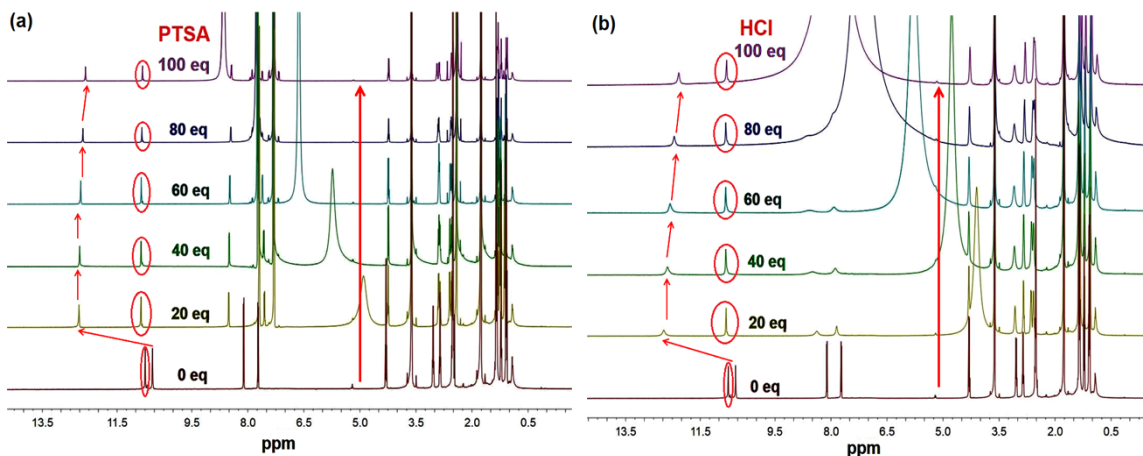

**Figure S31.**  $^1\text{H}$  NMR (600 MHz,  $\text{THF-}d_8$  at 298 K) spectroscopic titration results of host **7.7** with 100 equiv of PTSA (a) and 100 equiv of HCl (b), respectively.

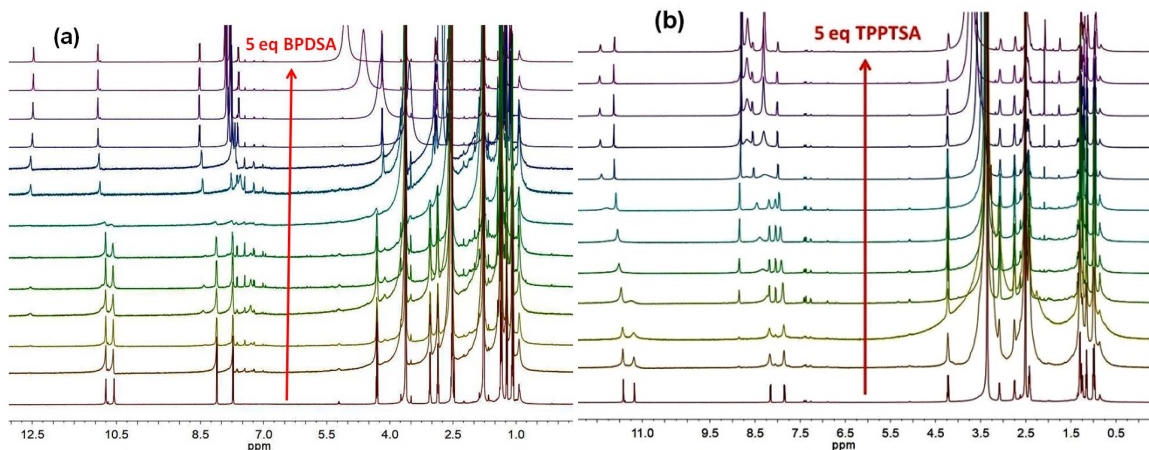

**Figure S32.**  $^1\text{H}$  NMR (600 MHz at 298 K) spectroscopic titration results of host **7.7** with 5 equiv of BPDSA (a) and 5 equiv of TPPTSA (b) in  $\text{THF-}d_8$  and  $\text{DMSO-}d_6$ , respectively. **Note:** Due to the poor solubility of TPPTSA in  $\text{THF-}d_8$ ,  $\text{DMSO-}d_6$  was used to effectuate the titration.

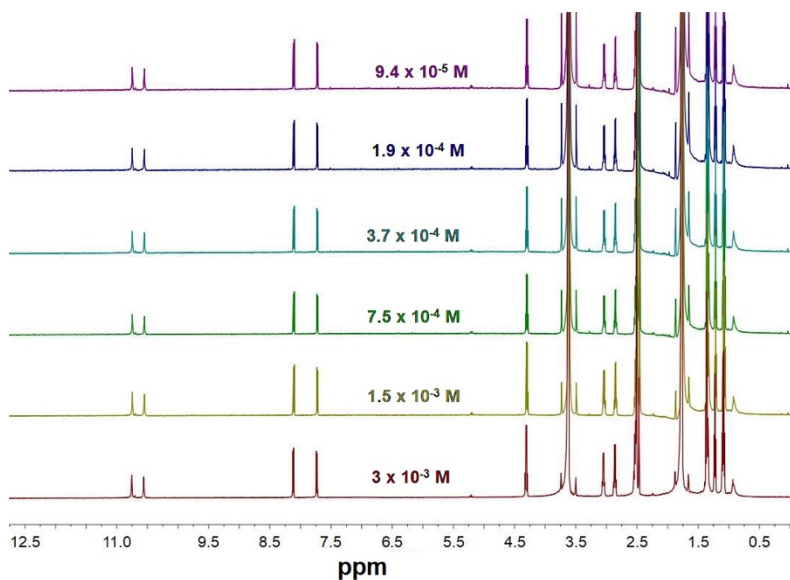

**Figure S33.**  $^1\text{H}$  NMR (600 MHz,  $\text{THF-}d_8$  at 298 K) spectra of the host **7.7** recorded at various concentrations ranging from  $3 \times 10^{-3}$  M to  $9.4 \times 10^{-5}$  M. **Note:** There is no any significant change in the chemical shift of the terminal NH proton signal at 10.75 ppm. All analyses were performed under identical experimental conditions.

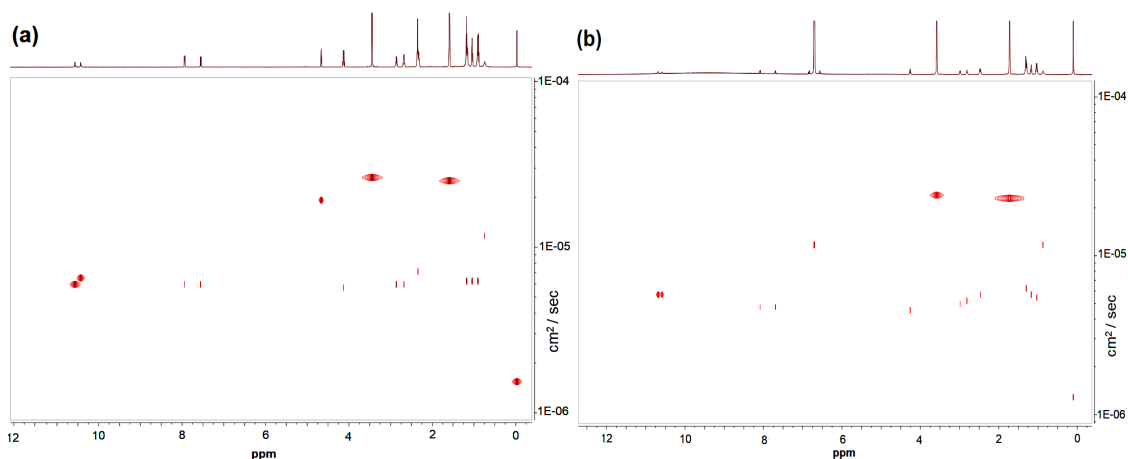

**Figure S34.** (a) DOSY  $^1\text{H}$  NMR (600 MHz,  $\text{THF-}d_8$  at 298 K) spectra of 10 mmol pristine host **7.7** and (b) host in the presence of 50 equiv of fumaric acid, respectively.

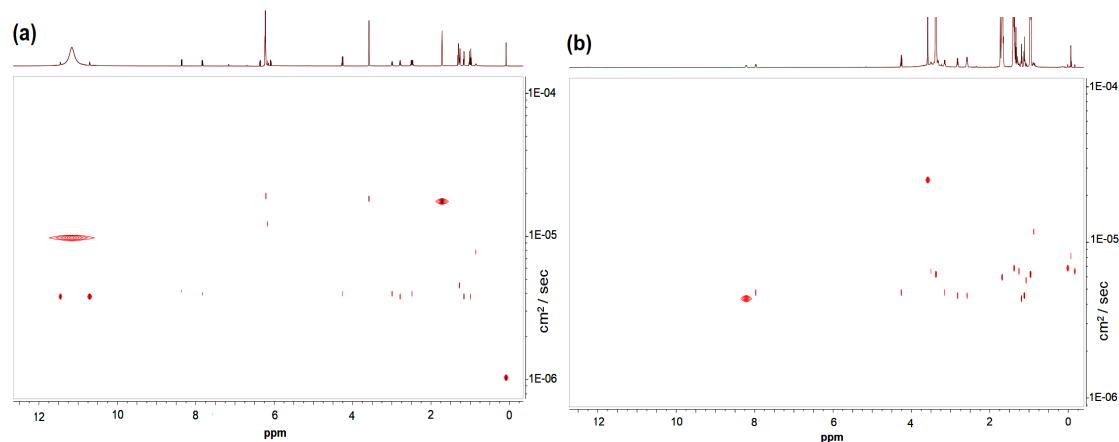

**Figure S35.** (a) DOSY  $^1\text{H}$  NMR (600 MHz,  $\text{THF-}d_8$  at 298 K) spectra of 10 mmol host **7.7** in the presence of 50 equiv of maleic acid and (b) in the presence of 20 equiv of TBAF, respectively.

**Table S1.** Summary of the diffusion coefficient values ( $\text{D}/\text{cm}^2\text{sec}^{-1}$ ) of host, TBAF and solvent (THF), respectively, determined from the  $^1\text{H}$  DOSY NMR titration experiments carried out in  $\text{THF-}d_8$  at 298 K.

| Entry              | $\text{D}_{\text{Guest}}$ | $\text{D}_{\text{Host}}$ | $\text{D}_{\text{THF}}$ |
|--------------------|---------------------------|--------------------------|-------------------------|
| Host only          | N/A                       | $5.56 \times 10^{-6}$    | $24.8 \times 10^{-6}$   |
| TBAF only          | $6.85 \times 10^{-6}$     | N/A                      | $24.8 \times 10^{-6}$   |
| Host : TBAF (1:20) | $6.16 \times 10^{-6}$     | $4.52 \times 10^{-6}$    | $24.8 \times 10^{-6}$   |



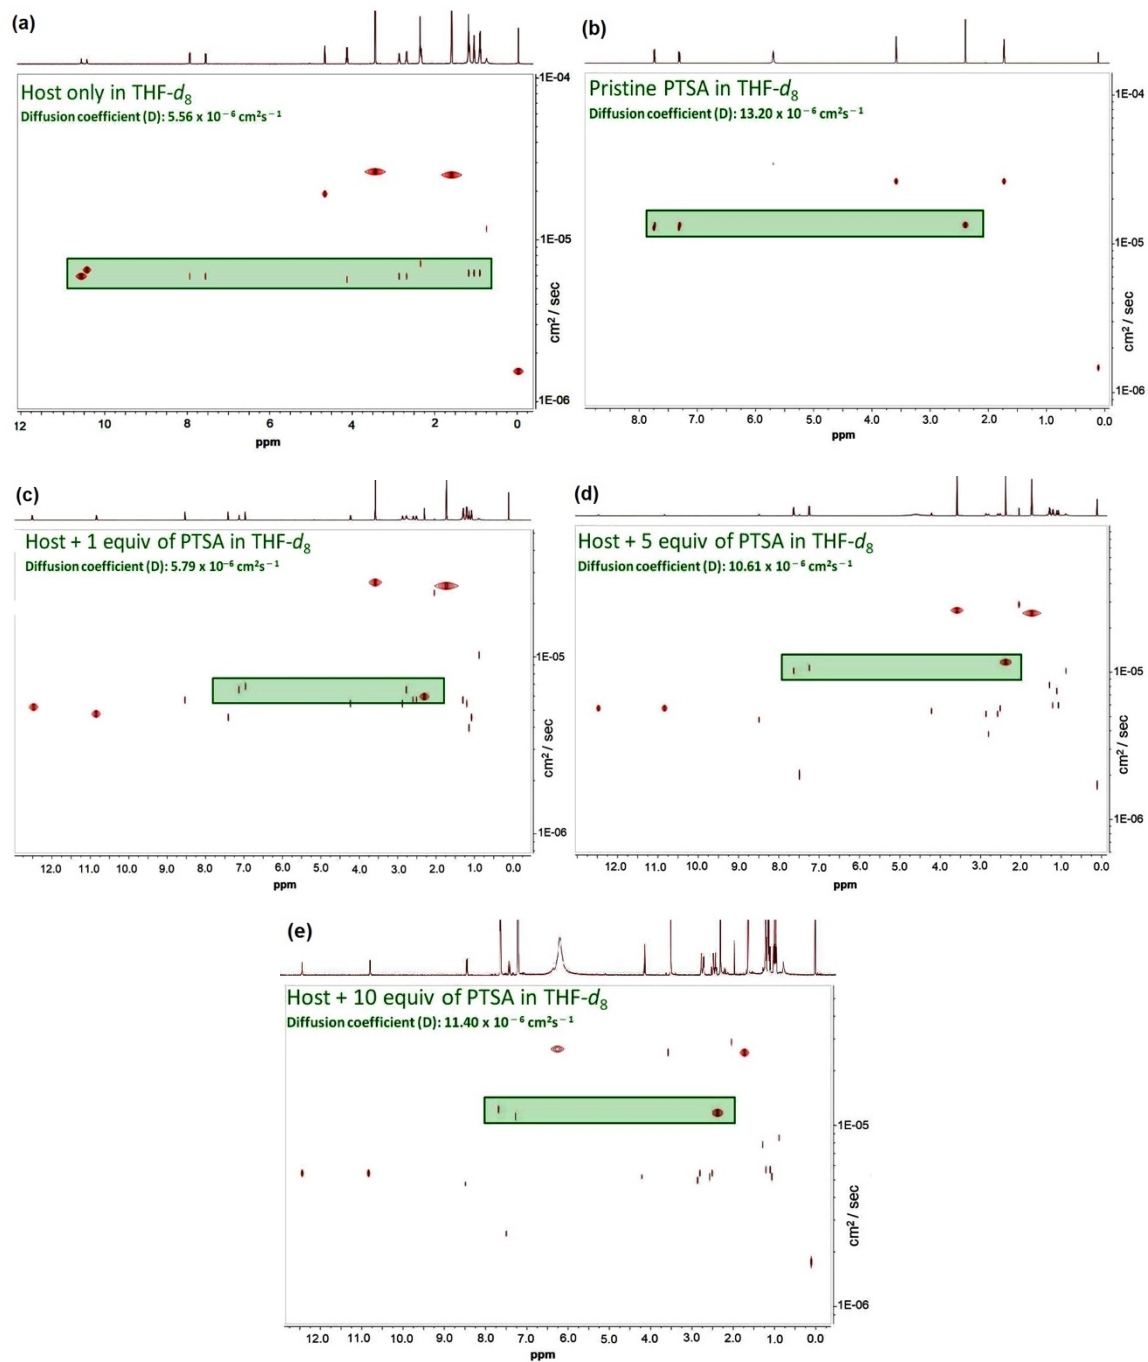

**Figure S36.** DOSY  $^1\text{H}$  NMR (600 MHz,  $\text{THF-d}_8$  at 298 K) spectroscopic titration results of host 7.7 in the presence of 1 equiv (a), 5 equiv (b), 10 equiv (c), pristine PTSA (d), and pristine host (e), respectively. The corresponding diffusion coefficient values are provided in Table S2 below.

**Table S2.** Summary of the diffusion coefficient values ( $D/\text{cm}^2\text{sec}^{-1}$ ) of host, guest, and solvent (THF), respectively, as determined from DOSY  $^1\text{H}$  NMR spectroscopic analyses (600 MHz,  $\text{THF}-d_8$  at 298 K).

| Entry              | $D_{\text{Guest}}$     | $D_{\text{Host}}$     | $D_{\text{THF}}$      |
|--------------------|------------------------|-----------------------|-----------------------|
| PTSA only          | $13.20 \times 10^{-6}$ | N/A                   | $24.8 \times 10^{-6}$ |
| Host : PTSA (1:1)  | $5.79 \times 10^{-6}$  | $5.56 \times 10^{-6}$ | $24.8 \times 10^{-6}$ |
| Host : PTSA (1:5)  | $10.61 \times 10^{-6}$ | $5.56 \times 10^{-6}$ | $24.8 \times 10^{-6}$ |
| Host : PTSA (1:10) | $11.40 \times 10^{-6}$ | $5.56 \times 10^{-6}$ | $24.8 \times 10^{-6}$ |
| Host only          | N/A                    | $5.56 \times 10^{-6}$ | $24.8 \times 10^{-6}$ |

### III) Additional Optical Studies

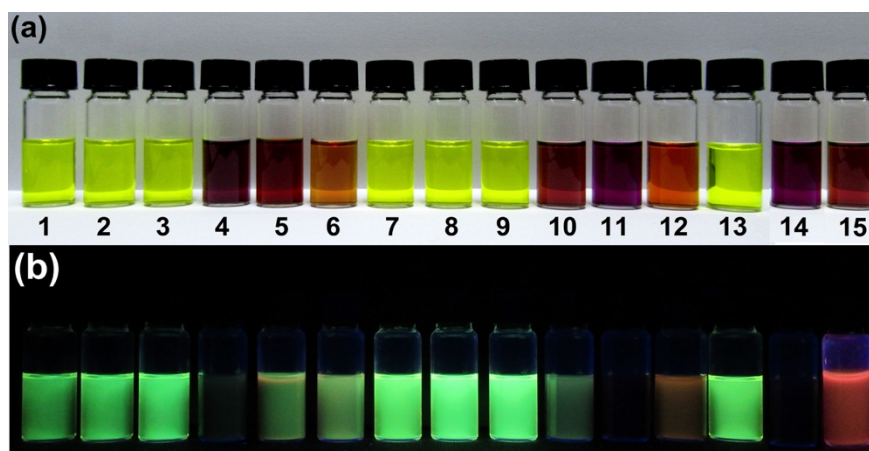

**Figure S37.** (a) Visible color change of host seen upon adding various guests, under ambient light: (1) only pristine host **7•7**, (2) with acetic acid, (3) with propionic acid, (4) with oxalic acid, (5) with maleic acid, (6) with malonic acid, (7) with fumaric acid, (8) with succinic acid, (9) with adipic acid, (10) with TFA, (11) with PTSA, (12) with TBAF, (13) with TBACl, (14) with BPDSA, and (15) TPPTSA, respectively. (b) The emission behavior of these same glass vials containing the host solution with the various added guests discussed above, under exposure of 365 nm UV light. All host–guest supramolecular complexes were prepared in anhydrous THF at 298 K.

**a) Absorption spectroscopic results:**

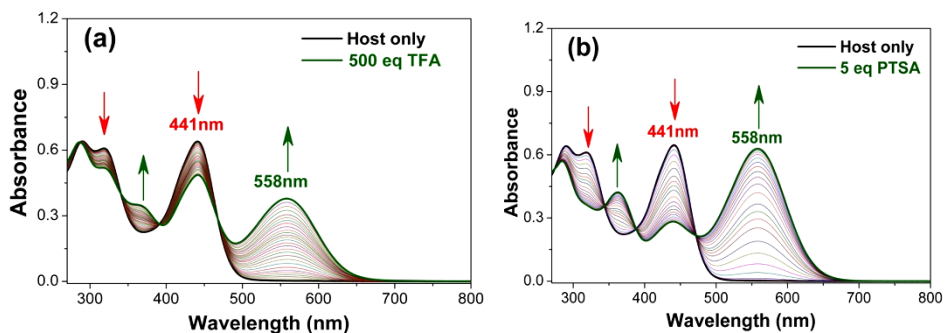

**Figure S38.** UV–Vis spectroscopic titration (anhydrous THF at 298 K) results of host **7.7** with TFA (a), and PTSA (b), respectively.

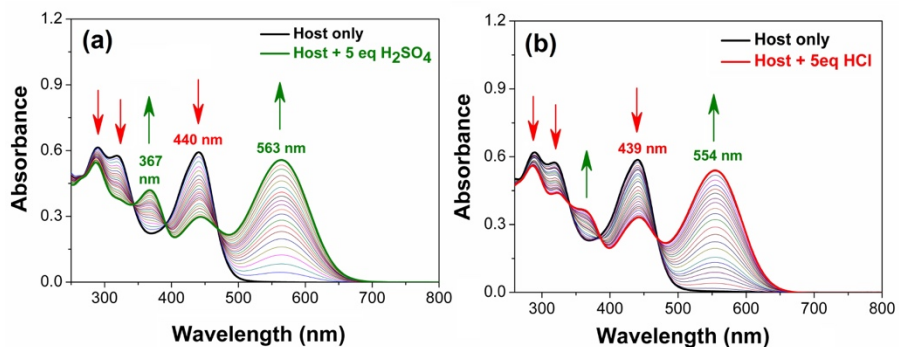

**Figure S39.** UV–Vis spectroscopic titration (anhydrous THF at 298 K) results of host **7.7** with H<sub>2</sub>SO<sub>4</sub> (a), and HCl (b), respectively.

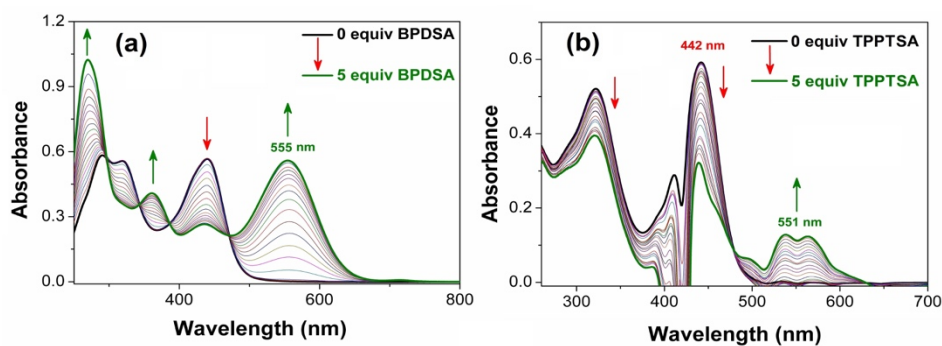

**Figure S40.** UV–Vis spectroscopic titration (298 K) results of host **7.7** with 5 equiv of BPDSA in anhydrous THF (a), and 5 equiv of TPPTSA in anhydrous DMSO (b), respectively. **Note:** In case of TPPTSA, the porphyrin-based absorptions were subtracted from the original spectra to highlight the change in the 551 nm region which is ascribed to the host–guest complexation process.

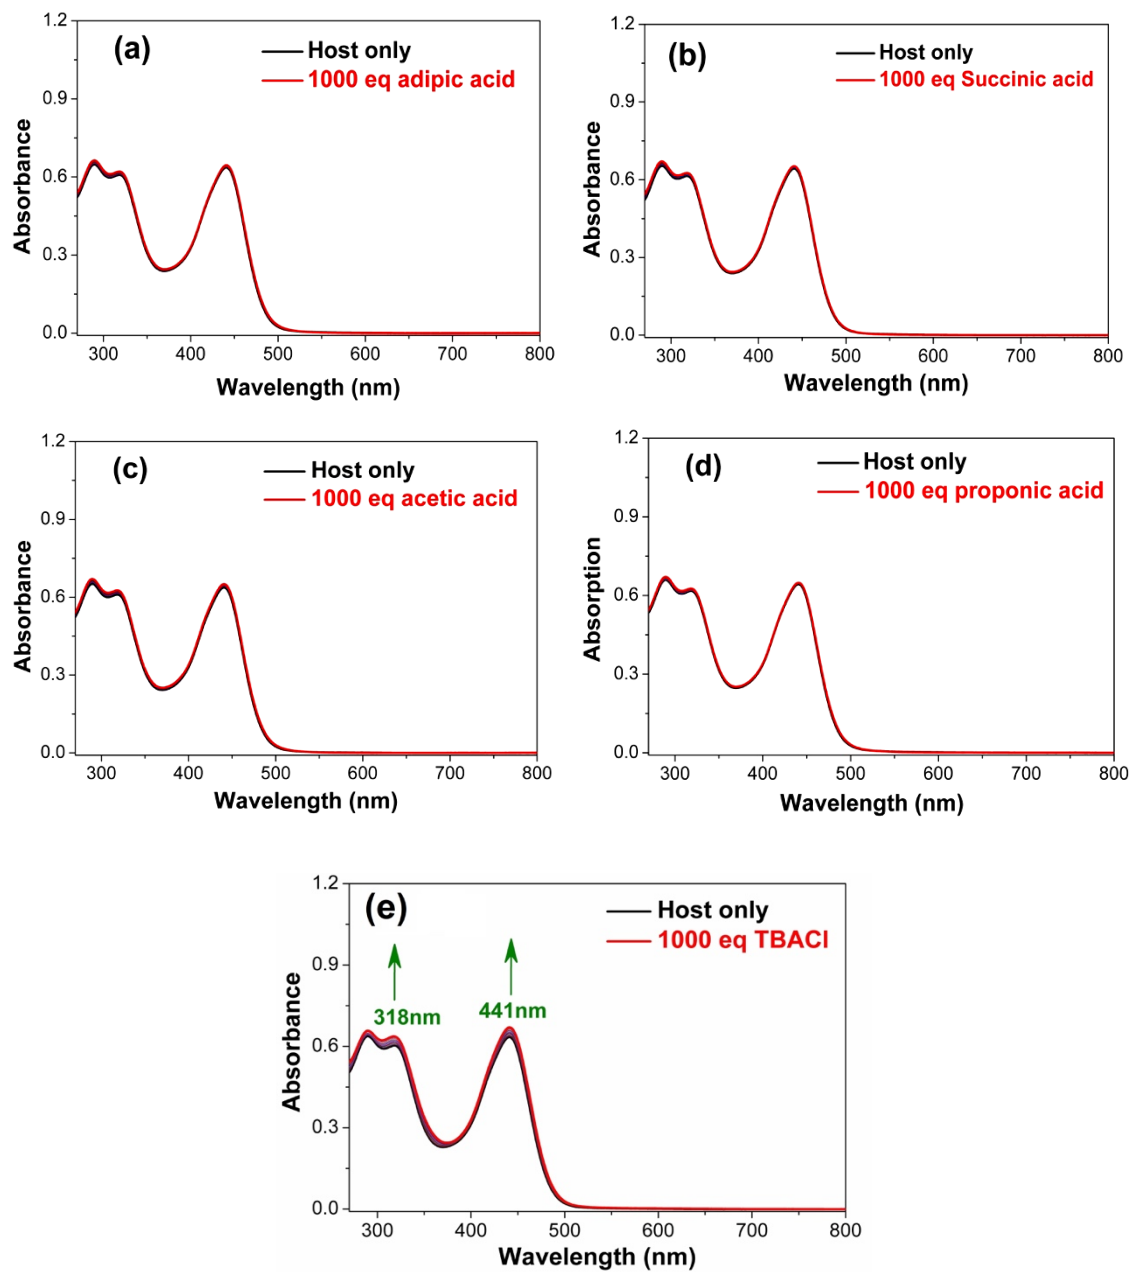

**Figure S41.** UV–Vis spectroscopic (anhydrous THF at 298 K) titration results of host **7.7** with adipic acid (a), succinic acid (b), acetic acid (c), propionic acid (d), and TBACl (e), respectively.

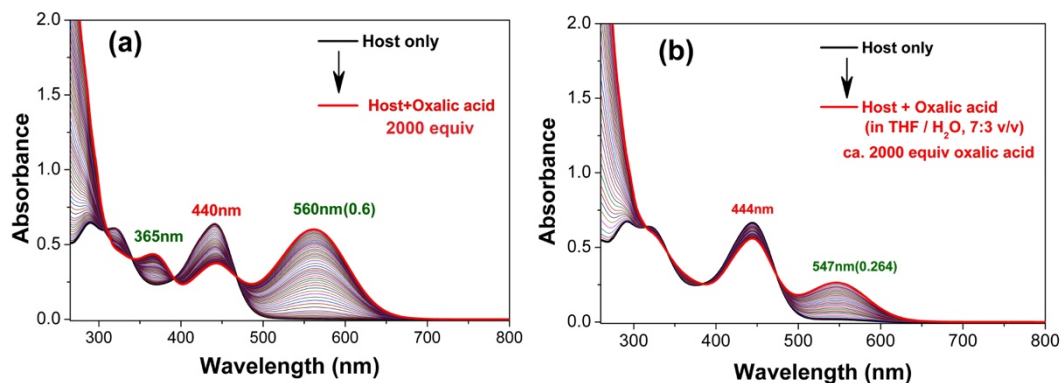

**Figure S42.** UV-Vis spectroscopic (298 K) titration results of host **7.7** with ca. 2000 equiv of oxalic acid in anhydrous THF (a), and titration of host **7.7** against oxalic acid in THF:H<sub>2</sub>O (7:3 v/v) (b), respectively.

**b) Emission spectroscopic titration results:**

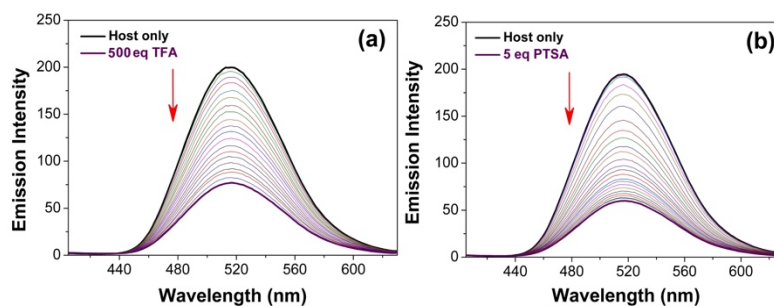

**Figure S43.** (a,b) Fluorescence spectroscopic ( $\lambda_{\text{ex}} = 320$  nm, anhydrous THF at 298 K) titration results of host **7.7** with TFA and PTSA, respectively.

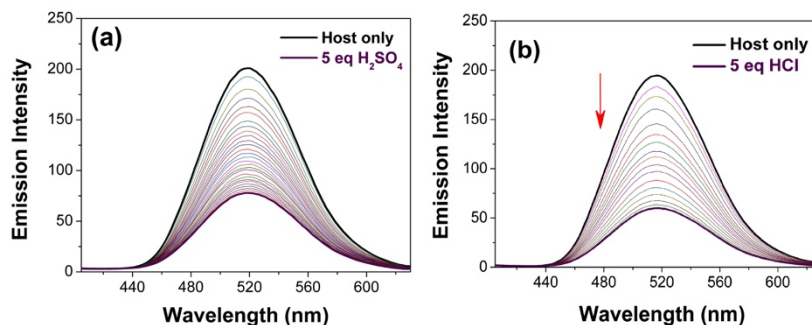

**Figure S44.** (a,b) Fluorescence spectroscopic ( $\lambda_{\text{ex}} = 320$  nm, anhydrous THF at 298 K) titration results of host **7.7** with up to 5 equiv of H<sub>2</sub>SO<sub>4</sub> and HCl, respectively.

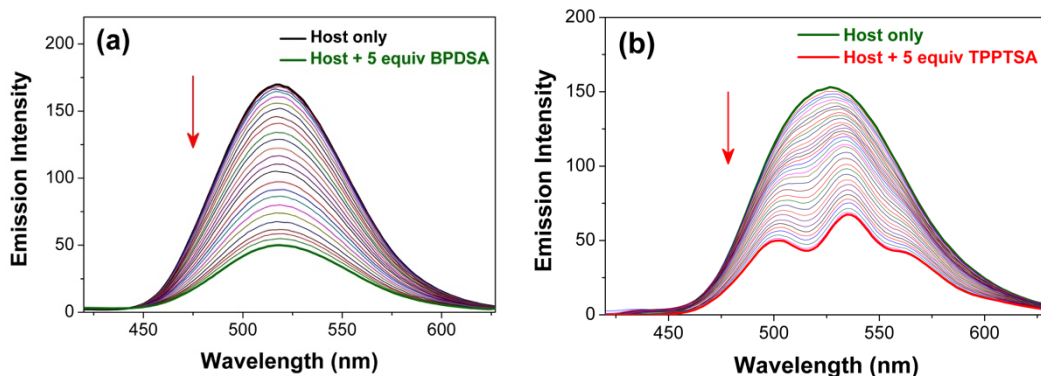

**Figure S45.** Fluorescence spectroscopic titration ( $\lambda_{\text{ex}} = 320$  nm, at 298 K) results of host **7.7** with up to 5 equiv of BPDSA in anhydrous THF (a), and 5 equiv of TPPTSA in anhydrous DMSO (b), respectively. **Note:** In case of TPPTSA, the porphyrin-based emissions were subtracted from the original spectra to highlight the actual quenching behavior ascribed to the host–guest complexation process.

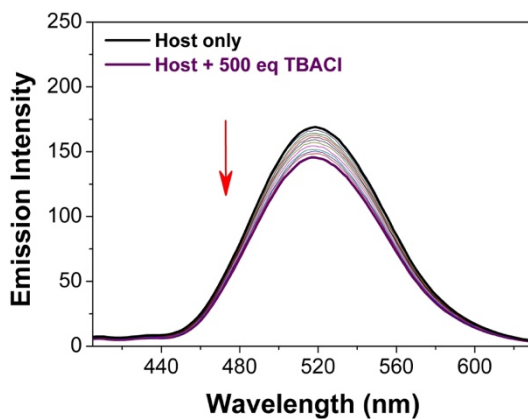

**Figure S46.** Fluorescence spectroscopic ( $\lambda_{\text{ex}} = 320$  nm, anhydrous THF at 298 K) titration results of host with up to 500 equiv of TBACl.

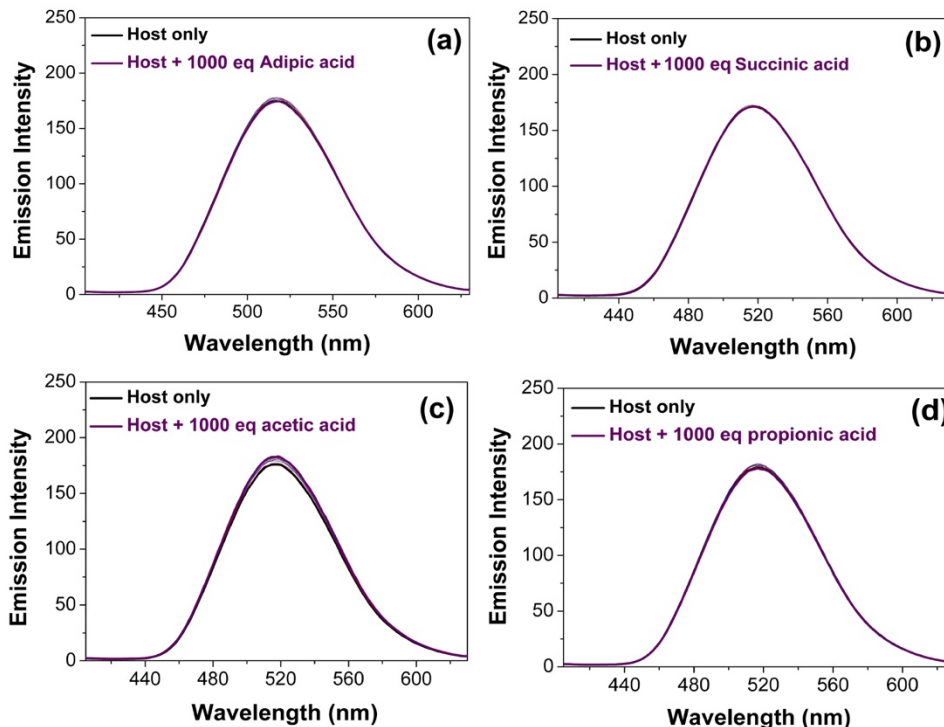

**Figure S47.** (a–d) Fluorescence spectroscopic ( $\lambda_{\text{ex}} = 320 \text{ nm}$ , anhydrous THF at 298 K) titration results of host **7•7** with adipic acid, succinic acid, acetic acid, and propionic acid, respectively.

**c) Isotherms created by fitting the data from selected fluorescence titration studies to standard 1:1 and statistical 1:2 binding equations.**

The data from selected fluorescence titration studies ( $1 \times 10^{-6} \text{ M}$  host **7•7** solution in THF, in a quartz cuvette having 1 cm path length, titrated with  $10^{-3} \text{ M}$  acid guest at constant host concentration) at 516 nm were fitted to standard 1:1 and statistical 1:2 binding profiles using BindFit.<sup>S4</sup> The resulting isotherms are provided below in Figure S48. However, as noted in the main text, the resulting numerical values should not be interpreted in terms of any simple physical model.

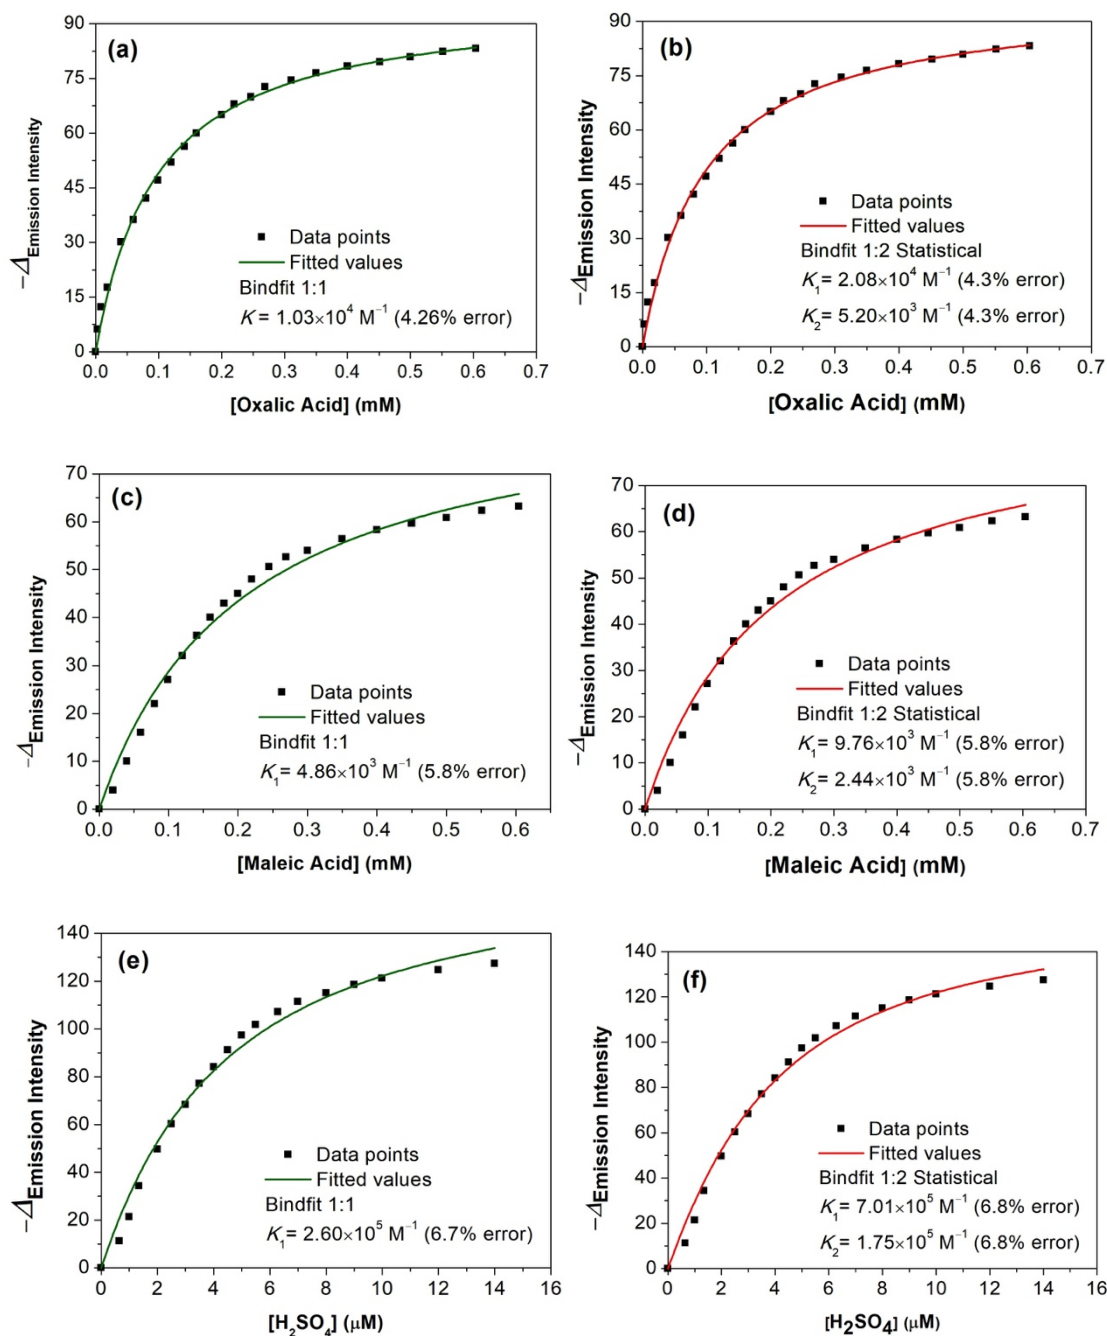

**Figure S48.** (a–f) Binding isotherms obtained from fluorescence spectroscopic titration results ( $\lambda_{\text{ex}} = 320 \text{ nm}$ , anhydrous THF at 298 K) of host **7.7** with the indicated acids by fitting to standard 1:1 and statistical 1:2 binding equations using BindFit.<sup>S4</sup>



#### d) Fits of UV–Vis spectroscopic titration data for H<sub>2</sub>SO<sub>4</sub>

The data from an absorption titration study where H<sub>2</sub>SO<sub>4</sub> ( $1 \times 10^{-5}$  M host **7•7** solution in THF in a quartz cuvette having 1 cm path length titrated against  $10^{-3}$  M sulfuric acid at constant host concentration) were fitted to standard statistical 1:2 binding profiles using BindFit.<sup>S4</sup> The resulting isotherm is provided below.

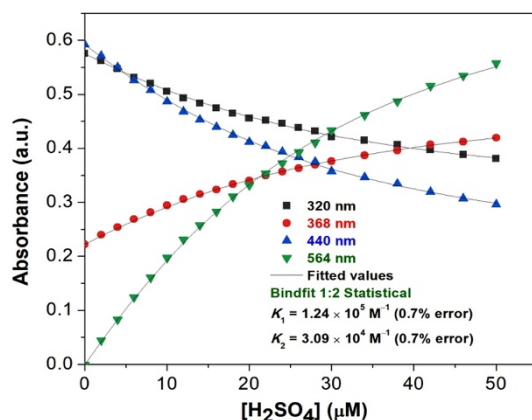

**Figure S49.** Fittings of UV–Vis spectroscopic titration data of host **7•7** with H<sub>2</sub>SO<sub>4</sub> in THF to a statistical 1:2 binding equation using BindFit.<sup>S4</sup>

## X-ray crystallographic information

### IV) Single crystal X-ray structural analyses of the compounds

**X-ray diffraction analysis of single crystals of 3:** Yellow block shaped crystals was obtained by vapor diffusion of hexanes into a CHCl<sub>3</sub> solution of **3**. The data were collected on a Bruker D8 Venture diffractometer with a PHOTON 100 detector and a  $\mu$ -focus CuK $\alpha$  radiation source ( $\lambda = 1.5418$  Å). The data were collected at 173 K. 9775 frames of data were collected using  $\phi$ - and  $\omega$ -scans with an oscillation angle of 1°, a scan range of 5.05–68.23°, a exposing time of 1.0 s per frame and a detector distance of 40 mm. Crystallographic data are listed in the **Table S3**. Data were collected using Bruker APEX III software. Unit cell refinement and data reduction were performed using Bruker SAINT V8.37A

software.<sup>S5</sup> The structure was solved by direct methods using SHELXT<sup>S6</sup> and refined by full-matrix least-squares on  $F^2$  with anisotropic displacement parameters for the non-H atoms using SHELXL-2018/3. The hydrogen atoms were calculated in ideal positions with a riding mode.

Crystallographic data has been deposited in the Cambridge Crystallographic Data Center with CCDC number: **1937460**. This data can be obtained free of charge at [http://www.ccdc.cam.ac.uk/data\\_request/cif](http://www.ccdc.cam.ac.uk/data_request/cif).

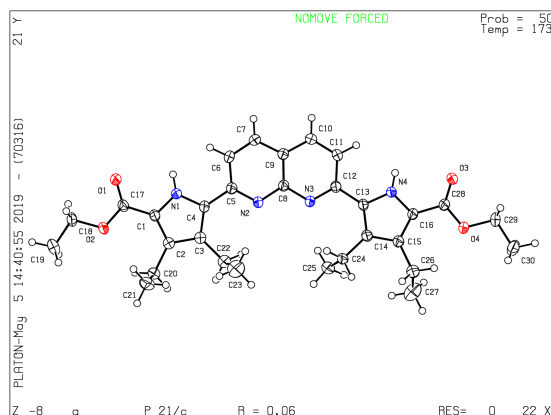

**Figure S50.** Asymmetric unit of the precursor **3** obtained from a single crystal X-ray diffraction analysis. The thermal ellipsoids are scaled to the 30% probability level.

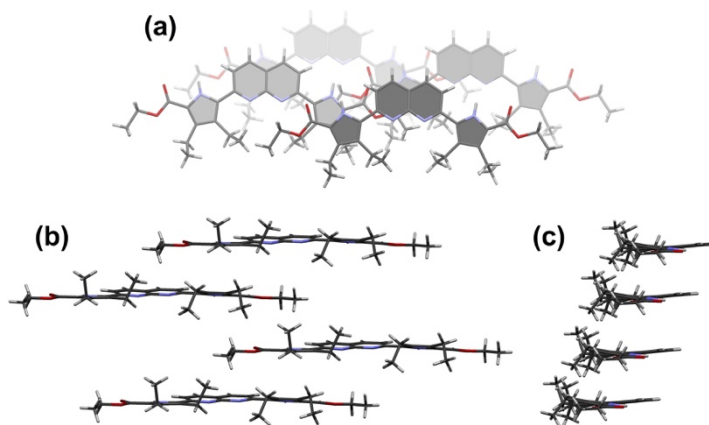

**Figure S51.** Different views of *J*-type aggregated pattern of precursor **3** obtained from a single crystal X-ray diffraction analysis.

**Table S3.** Crystallographic data and structure refinement parameters for **3**.

|                                                     |                                                                                                                                                               |
|-----------------------------------------------------|---------------------------------------------------------------------------------------------------------------------------------------------------------------|
| Identification code                                 | <b>3</b>                                                                                                                                                      |
| Empirical formula                                   | C <sub>30</sub> H <sub>36</sub> N <sub>4</sub> O <sub>4</sub>                                                                                                 |
| Formula weight                                      | 516.63                                                                                                                                                        |
| Temperature                                         | 173 K                                                                                                                                                         |
| Wavelength                                          | 1.54178 Å                                                                                                                                                     |
| Crystal system                                      | Monoclinic                                                                                                                                                    |
| Space group                                         | P 2 <sub>1</sub> /c                                                                                                                                           |
| Unit cell dimensions                                | $a = 11.0628(2) \text{ \AA}$ $\alpha = 90^\circ$<br>$b = 26.8155(4) \text{ \AA}$ $\beta = 98.755(1)^\circ$<br>$c = 9.3804(1) \text{ \AA}$ $\gamma = 90^\circ$ |
| Volume                                              | 2750.31(7) Å <sup>3</sup>                                                                                                                                     |
| Z                                                   | 4                                                                                                                                                             |
| Calculated density                                  | 1.248 g/m <sup>3</sup>                                                                                                                                        |
| Absorption coefficient                              | 0.673 mm <sup>-1</sup>                                                                                                                                        |
| F(000)                                              | 1104                                                                                                                                                          |
| Crystal size                                        | 0.200 × 0.180 × 0.150 mm <sup>3</sup>                                                                                                                         |
| Theta range for data collection                     | 4.043 to 66.578°                                                                                                                                              |
| Limiting indices                                    | -13 ≤ <i>h</i> ≤ 13, -31 ≤ <i>k</i> ≤ 31, -11 ≤ <i>l</i> ≤ 11                                                                                                 |
| Reflections collected/unique                        | 45743 / 4831 [ <i>R</i> <sub>int</sub> = 0.0258]                                                                                                              |
| Completeness to $\theta = 24.295^\circ$             | 99.7%                                                                                                                                                         |
| Absorption correction                               | Semi-empirical from equivalents                                                                                                                               |
| Max. and min. transmission                          | 0.906 and 0.877                                                                                                                                               |
| Refinement method                                   | Full-matrix least-squares on <i>F</i> <sup>2</sup>                                                                                                            |
| Data/restraints/parameters                          | 4831 / 0 / 349                                                                                                                                                |
| Goodness-of-fit on <i>F</i> <sup>2</sup>            | 1.028                                                                                                                                                         |
| Final <i>R</i> indices [ <i>I</i> > 2σ( <i>I</i> )] | <i>R</i> <sub>1</sub> = 0.0619, <i>wR</i> <sub>2</sub> = 0.1635                                                                                               |
| <i>R</i> indices (all data)                         | <i>R</i> <sub>1</sub> = 0.0650, <i>wR</i> <sub>2</sub> = 0.1664                                                                                               |
| Extinction coefficient                              | n/a                                                                                                                                                           |
| Largest diff. peak and hole                         | 1.301 and -0.485 e Å <sup>-3</sup>                                                                                                                            |
| <b>CCDC No 1937460</b>                              |                                                                                                                                                               |

**X-ray diffraction analysis of single crystals of [7•7(CHCl<sub>3</sub>)<sub>4</sub>]:** Yellow rod shaped crystals were obtained by vapor diffusion of petroleum ether into a chloroform solution of **7**. The data were collected on an X-ray diffractometer Bruker/ARINAX MD2 equipped with a MarCCD-300 detector ( $\lambda = 0.68875 \text{ \AA}$ ), at beam line station BL17B of Shanghai Synchrotron Radiation Facility (SSRF). Suitable single crystals were mounted

on a Nylon loop with the protection of Paratone-N oil for diffraction at 100 K. 360 frames of data were collected using  $\omega$ -scans with an oscillation angle of  $1^\circ$ , a scan range of  $0.00$ - $361.00^\circ$ , an exposing time of 1.0 s per frame and a detector distance of 90 mm. Crystallographic data are listed in the **Table S4**. Data were collected using BlueIce software package.<sup>S7</sup> Unit cell refinement and data reduction were performed using HKL3000 software package.<sup>S8</sup> The structure was solved by direct methods using SHELXT<sup>S6</sup> and refined by full-matrix least-squares on F2 with anisotropic displacement parameters for the non-H atoms using SHELXL-2018/3. The hydrogen atoms were calculated in ideal positions with a riding mode.

Crystallographic data has been deposited in the Cambridge Crystallographic Data Center with CCDC number: **1937464**. This data can be obtained free of charge at [http://www.ccdc.cam.ac.uk/data\\_request/cif](http://www.ccdc.cam.ac.uk/data_request/cif).

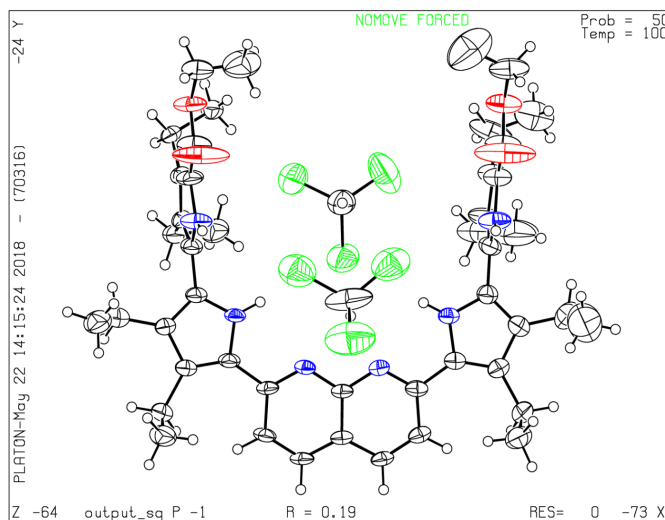

**Figure S52.** Asymmetric unit of  $[7\cdot 7(\text{CHCl}_3)_4]$ , obtained from a single crystal X-ray diffraction analysis. The thermal ellipsoids are scaled to the 30% probability level.

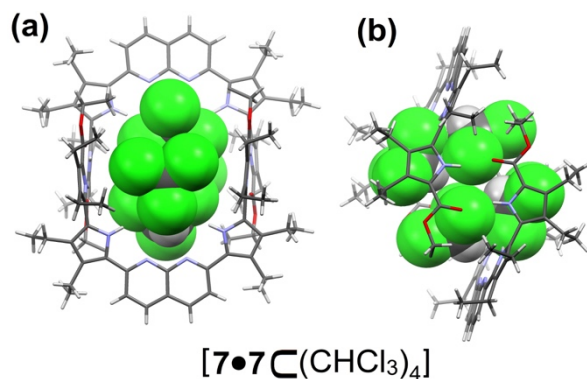

**Figure S53.** Single crystal X-ray structure of [7•7(CHCl<sub>3</sub>)<sub>4</sub>] showing four encapsulated solvent (CHCl<sub>3</sub>) molecules inside the capsule.

**Table S4.** Crystallographic data and structure refinement parameters for [7•7(CHCl<sub>3</sub>)<sub>4</sub>].

|                                          |                                                                                |                           |
|------------------------------------------|--------------------------------------------------------------------------------|---------------------------|
| Identification code                      | <b>7•7(CHCl<sub>3</sub>)<sub>4</sub></b>                                       |                           |
| Empirical formula                        | C <sub>48</sub> H <sub>57</sub> Cl <sub>6</sub> N <sub>12</sub> O <sub>4</sub> |                           |
| Formula weight                           | 994.69                                                                         |                           |
| Temperature                              | 100(2) K                                                                       |                           |
| Wavelength                               | 0.68875 Å                                                                      |                           |
| Crystal system                           | Triclinic                                                                      |                           |
| Space group                              | P-1                                                                            |                           |
| Unit cell dimensions                     | $a = 12.130(2) \text{ \AA}$                                                    | $\alpha = 78.46(3)^\circ$ |
|                                          | $b = 14.831(3) \text{ \AA}$                                                    | $\beta = 88.91(3)^\circ$  |
|                                          | $c = 16.344(3) \text{ \AA}$                                                    | $\gamma = 69.37(3)^\circ$ |
| Volume                                   | 2691.9(10) Å <sup>3</sup>                                                      |                           |
| Z                                        | 2                                                                              |                           |
| Calculated density                       | 1.227 g/m <sup>3</sup>                                                         |                           |
| Absorption coefficient                   | 0.336 mm <sup>-1</sup>                                                         |                           |
| F(000)                                   | 1042                                                                           |                           |
| Crystal size                             | 0.300 × 0.120 × 0.030 mm <sup>3</sup>                                          |                           |
| Theta range for data collection          | 1.701 to 24.295°                                                               |                           |
| Limiting indices                         | 0 ≤ <i>h</i> ≤ 7, -17 ≤ <i>k</i> ≤ 21, -23 ≤ <i>l</i> ≤ 23                     |                           |
| Reflections collected/unique             | 8980 / 8980 [ <i>R</i> <sub>int</sub> = 0.00]                                  |                           |
| Completeness to $\theta = 24.295^\circ$  | 93.2%                                                                          |                           |
| Absorption correction                    | Semi-empirical from equivalents                                                |                           |
| Max. and min. transmission               | 0.990 and 0.906                                                                |                           |
| Refinement method                        | Full-matrix least-squares on <i>F</i> <sup>2</sup>                             |                           |
| Data/restraints/parameters               | 8980 / 15 / 587                                                                |                           |
| Goodness-of-fit on <i>F</i> <sup>2</sup> | 1.016                                                                          |                           |

|                                        |                                    |
|----------------------------------------|------------------------------------|
| Final $R$ indices [ $I > 2\sigma(I)$ ] | $R_1 = 0.1903$ , $wR_2 = 0.3995$   |
| $R$ indices (all data)                 | $R_1 = 0.2016$ , $wR_2 = 0.4041$   |
| Extinction coefficient                 | 0.084(10)                          |
| Largest diff. peak and hole            | 1.667 and -1.235 e.Å <sup>-3</sup> |
| <b>CCDC No 1937464</b>                 |                                    |

**X-ray diffraction analysis of single crystals of [(7•7H<sub>2</sub>)<sup>2+</sup>⊂(Hmaleate<sup>-</sup>)<sub>2</sub>].** Single crystals grew as yellow rods by vapor diffusion of hexanes into a THF solution containing **7** and maleic acid. The data were collected on a Bruker D8 QUEST diffractometer using a  $\mu$ -focus CuK $\alpha$  radiation source ( $\lambda = 1.5418$  Å) with collimating mirror monochromators. The data were collected at 150 K. 720 frames of data were collected using  $\phi$ - and  $\omega$ -scans with an oscillation angle of 1°, a scan range of 2.74–67.06°, a exposing time of 1.0 s per frame and a detector distance of 45 mm. Crystallographic data are listed in the **Table S5**. Data were collected using Bruker APEX III software. Unit cell refinement and data reduction were performed using SAINT V8.378A software.<sup>S5</sup> The structure was solved by direct methods using SHELXT<sup>S6</sup> and refined by full-matrix least-squares on  $F^2$  with anisotropic displacement parameters for the non-H atoms using SHELXL-2018/3. The hydrogen atoms were calculated in ideal positions with a riding mode. SQUEEZE routine was applied by using PLATON<sup>S9</sup> for some electron densities which could not reasonably modeled.

Crystallographic data has been deposited in the Cambridge Crystallographic Data Center with CCDC number: **1951164**. This data can be obtained free of charge at [http://www.ccdc.cam.ac.uk/data\\_request/cif](http://www.ccdc.cam.ac.uk/data_request/cif).

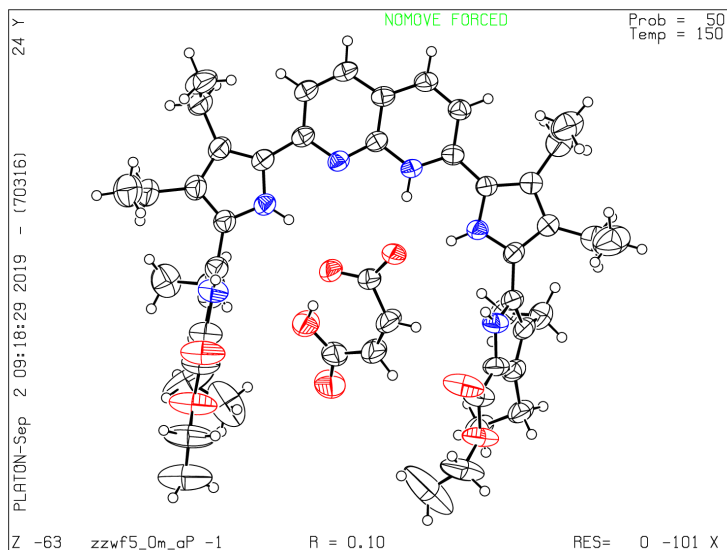

**Figure S54.** Asymmetric unit of  $[(7\bullet 7H_2)^{2+}C(Hmaleate^-)_2]$ , obtained from a single crystal X-ray diffraction analysis. The thermal ellipsoids are scaled to the 30% probability level.

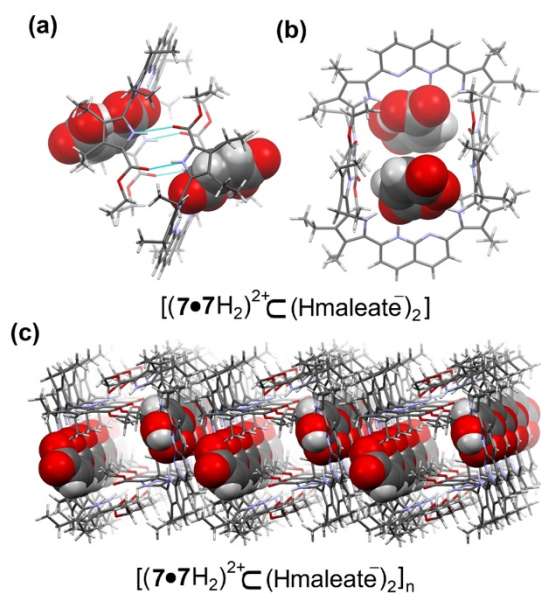

**Figure S55.** (a,b) The single crystal X-ray structure of  $[(7\bullet 7H_2)^{2+}C(Hmaleate^-)_2]$  showing two encapsulated maleate anions inside the capsule. (c) 3D view of Hmaleate guests inside the infinite channel of capsules.

**Table S5.** Crystallographic data and structure refinement parameters for [(7•7H<sub>2</sub>)<sup>2+</sup>⊂(Hmaleate<sup>-</sup>)<sub>2</sub>] supramolecular ensemble.

|                                                     |                                                                 |                             |
|-----------------------------------------------------|-----------------------------------------------------------------|-----------------------------|
| Identification code                                 | 7•7(maleic acid) <sub>2</sub>                                   |                             |
| Empirical formula                                   | C <sub>50</sub> H <sub>62</sub> N <sub>6</sub> O <sub>8</sub>   |                             |
| Formula weight                                      | 875.05                                                          |                             |
| Temperature                                         | 150(2) K                                                        |                             |
| Wavelength                                          | 1.54178 Å                                                       |                             |
| Crystal system                                      | Triclinic                                                       |                             |
| Space group                                         | P-1                                                             |                             |
| Unit cell dimensions                                | $a = 12.8492(11) \text{ \AA}$                                   | $\alpha = 102.285(4)^\circ$ |
|                                                     | $b = 14.4967(12) \text{ \AA}$                                   | $\beta = 91.716(4)^\circ$   |
|                                                     | $c = 16.6539(14) \text{ \AA}$                                   | $\gamma = 112.279(4)^\circ$ |
| Volume                                              | 2783.8(4) Å <sup>3</sup>                                        |                             |
| Z                                                   | 2                                                               |                             |
| Calculated density                                  | 1.044 g/m <sup>3</sup>                                          |                             |
| Absorption coefficient                              | 0.575 mm <sup>-1</sup>                                          |                             |
| F(000)                                              | 936                                                             |                             |
| Crystal size                                        | 0.118 × 0.113 × 0.098 mm <sup>3</sup>                           |                             |
| Theta range for data collection                     | 2.736 to 67.062°                                                |                             |
| Limiting indices                                    | -15 ≤ <i>h</i> ≤ 15, -17 ≤ <i>k</i> ≤ 16, -19 ≤ <i>l</i> ≤ 19   |                             |
| Reflections collected/unique                        | 84912 / 9833 [ <i>R</i> <sub>int</sub> = 0.1073]                |                             |
| Completeness to $\theta = 67.684^\circ$             | 98.8%                                                           |                             |
| Absorption correction                               | Semi-empirical from equivalents                                 |                             |
| Max. and min. transmission                          | 0.946 and 0.935                                                 |                             |
| Refinement method                                   | Full-matrix least-squares on <i>F</i> <sup>2</sup>              |                             |
| Data/restraints/parameters                          | 9833 / 2 / 589                                                  |                             |
| Goodness-of-fit on <i>F</i> <sup>2</sup>            | 1.078                                                           |                             |
| Final <i>R</i> indices [ <i>I</i> > 2σ( <i>I</i> )] | <i>R</i> <sub>1</sub> = 0.0963, <i>wR</i> <sub>2</sub> = 0.2107 |                             |
| <i>R</i> indices (all data)                         | <i>R</i> <sub>1</sub> = 0.1597, <i>wR</i> <sub>2</sub> = 0.2422 |                             |
| Extinction coefficient                              | 0.00151(14)                                                     |                             |
| Largest diff. peak and hole                         | 0.790 and -0.469 e Å <sup>-3</sup>                              |                             |
| <b>CCDC No 1951164</b>                              |                                                                 |                             |

**X-ray diffraction analysis of single crystals of [(7•7H<sub>2</sub>)<sup>2+</sup>⊂{(Hoxalate<sup>-</sup>)<sub>2</sub>(THF)<sub>2</sub>}]**: Red needle like crystals were grown by vapor diffusion of hexanes into a THF solution containing **7** and oxalic acid. The data were collected on the same



diffractometer as  $[(7\cdot7\text{H}_2)^{2+}\text{C}(\text{Hmaleate}^-)_2]$  with the same radiation source. The strategy for collection was also the same except that a scan range of 2.70–67.07° and a exposing time of 3.0 s per frame. Crystallographic data are listed in the **Table S6**. Data were collected using Bruker APEX III software. Unit cell refinement and data reduction were performed using SAINT V8.38A software.<sup>S5</sup> The structure was solved by direct methods using SHELXT<sup>S6</sup> and refined by full-matrix least-squares on  $F^2$  with anisotropic displacement parameters for the non-H atoms using SHELXL-2018/3. The hydrogen atoms were calculated in ideal positions with a riding mode. SQUEEZE routine was applied by using PLATON<sup>S9</sup> for some electron densities which could not reasonably modeled.

Crystallographic data has been deposited in the Cambridge Crystallographic Data Center with CCDC number: **1951162**. This data can be obtained free of charge at [http://www.ccdc.cam.ac.uk/data\\_request/cif](http://www.ccdc.cam.ac.uk/data_request/cif).

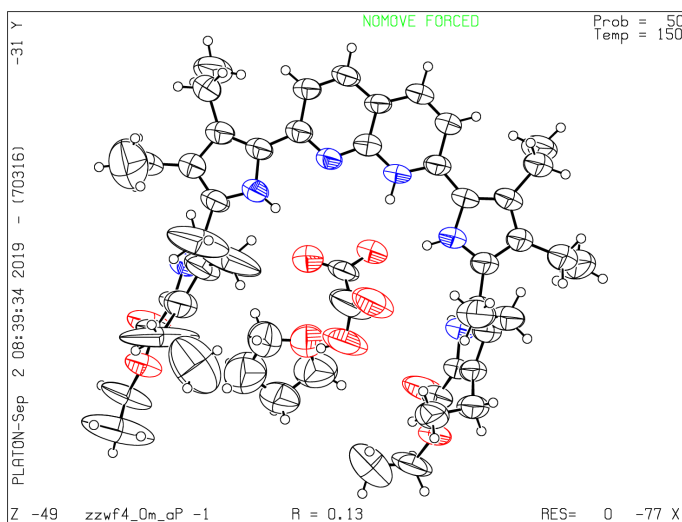

**Figure S56.** Asymmetric unit of  $[(7\cdot7\text{H}_2)^{2+}\text{C}\{(\text{Hoxalate}^-)_2(\text{THF})_2\}]$  obtained from a single crystal X-ray diffraction analysis. The thermal ellipsoids are scaled to the 30% probability level.

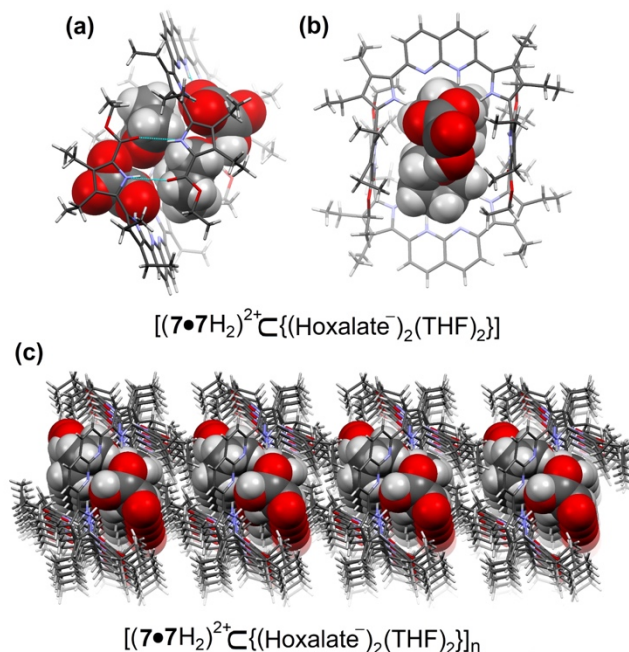

**Figure S57.** (a,b) Single crystal X-ray structure of  $[(7\bullet 7H_2)^{2+}\subset\{(Hoxalate^-)_2(THF)_2\}]$ , showing two encapsulated oxalate anions along with two solvent (THF) molecules inside the capsule. (c) 3D view of guests inside the infinite channel made up of capsules **7•7**.

**Table S6.** Crystallographic data and structure refinement parameters for  $[(7\bullet 7H_2)^{2+}\subset\{(Hoxalate^-)_2(THF)_2\}]$  supramolecular ensemble.

|                                 |                                                               |                            |
|---------------------------------|---------------------------------------------------------------|----------------------------|
| Identification code             | <b>7•7</b> (oxalic acid) <sub>2</sub> (THF) <sub>2</sub>      |                            |
| Empirical formula               | C <sub>52</sub> H <sub>68</sub> N <sub>6</sub> O <sub>9</sub> |                            |
| Formula weight                  | 921.12                                                        |                            |
| Temperature                     | 150(2) K                                                      |                            |
| Wavelength                      | 1.54178 Å                                                     |                            |
| Crystal system                  | Triclinic                                                     |                            |
| Space group                     | P-1                                                           |                            |
| Unit cell dimensions            | $a = 12.0076(6)$ Å                                            | $\alpha = 73.739(2)^\circ$ |
|                                 | $b = 14.8684(7)$ Å                                            | $\beta = 86.373(3)^\circ$  |
|                                 | $c = 17.0843(8)$ Å                                            | $\gamma = 68.275(2)^\circ$ |
| Volume                          | 2717.3(2) Å <sup>3</sup>                                      |                            |
| Z                               | 2                                                             |                            |
| Calculated density              | 1.126 g/m <sup>3</sup>                                        |                            |
| Absorption coefficient          | 0.625 mm <sup>-1</sup>                                        |                            |
| F(000)                          | 988                                                           |                            |
| Crystal size                    | 0.224 × 0.092 × 0.091 mm <sup>3</sup>                         |                            |
| Theta range for data collection | 2.697 to 67.075°                                              |                            |

|                                         |                                                              |
|-----------------------------------------|--------------------------------------------------------------|
| Limiting indices                        | $-14 \leq h \leq 14, -17 \leq k \leq 17, -20 \leq l \leq 20$ |
| Reflections collected/unique            | 103564 / 9699 [ $R_{\text{int}} = 0.2760$ ]                  |
| Completeness to $\theta = 67.054^\circ$ | 100.0%                                                       |
| Absorption correction                   | Semi-empirical from equivalents                              |
| Max. and min. transmission              | 0.945 and 0.873                                              |
| Refinement method                       | Full-matrix least-squares on $F^2$                           |
| Data / restraints / parameters          | 9699 / 25 / 617                                              |
| Goodness-of-fit on $F^2$                | 1.003                                                        |
| Final $R$ indices [ $I > 2\sigma(I)$ ]  | $R_1 = 0.1250, wR_2 = 0.2221$                                |
| $R$ indices (all data)                  | $R_1 = 0.2511, wR_2 = 0.2804$                                |
| Extinction coefficient                  | 0.00092(7)                                                   |
| Largest diff. peak and hole             | 0.762 and $-0.395 \text{ e \AA}^{-3}$                        |
| <b>CCDC No 1951162</b>                  |                                                              |

**X-ray diffraction analysis of single crystals of  $[(7\bullet 7\text{H}_2)^{2+} \subset \{(\text{Hmalonate}^-)_2(\text{THF})_2\}]$ .** Single crystals grew as yellow rods by vapor diffusion of hexanes into a THF solution containing **7** and malonic acid. The data were collected on a Rigaku XtaLAB AFC12 diffractometer with a  $\mu$ -focus  $\text{CuK}\alpha$  radiation source ( $\lambda = 1.5418 \text{ \AA}$ ) and a Kappa goniometer. The data were collected at 173 K. 3357 frames of data were collected using  $\phi$ - and  $\omega$ -scans with an oscillation angle of  $1^\circ$ , a scan range of  $3.60\text{--}67.06^\circ$ , a exposing time of 1.0 s per frame and a detector distance of 60 mm. Crystallographic data are listed in the **Table S7**. Data were collected using CrysAlisPro 1.171.39.32a software.<sup>S10</sup> Unit cell refinement and data reduction were performed using the same software. The structure was solved by direct methods using SHELXT<sup>S6</sup> and refined by full-matrix least-squares on  $F^2$  with anisotropic displacement parameters for the non-H atoms using SHELXL-2018/3. The hydrogen atoms were calculated in ideal positions with a riding mode.

Crystallographic data has been deposited in the Cambridge Crystallographic Data Center with CCDC number: **1951163**. This data can be obtained free of charge at [http://www.ccdc.cam.ac.uk/data\\_request/cif](http://www.ccdc.cam.ac.uk/data_request/cif).

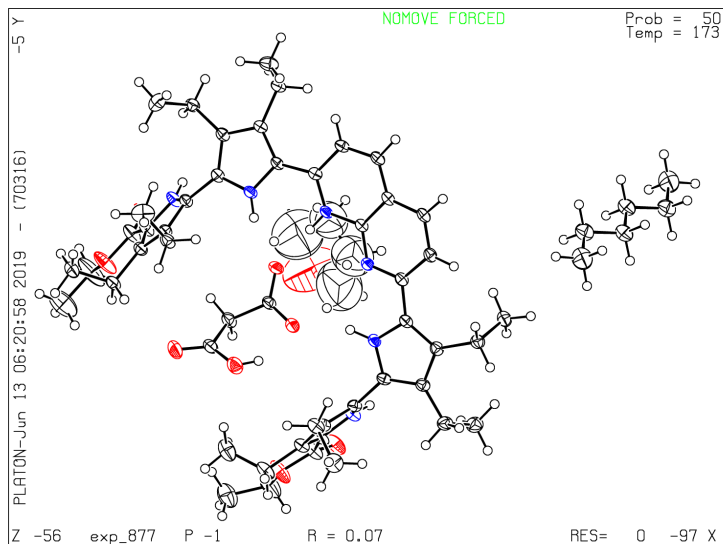

**Figure S58.** Asymmetric unit of  $[(7\bullet7H_2)^{2+} \cdot \{(Hmalonate^-)_2(THF)_2\}]$  obtained from the single crystal X-ray diffraction analysis. The thermal ellipsoids are scaled to the 30% probability level.

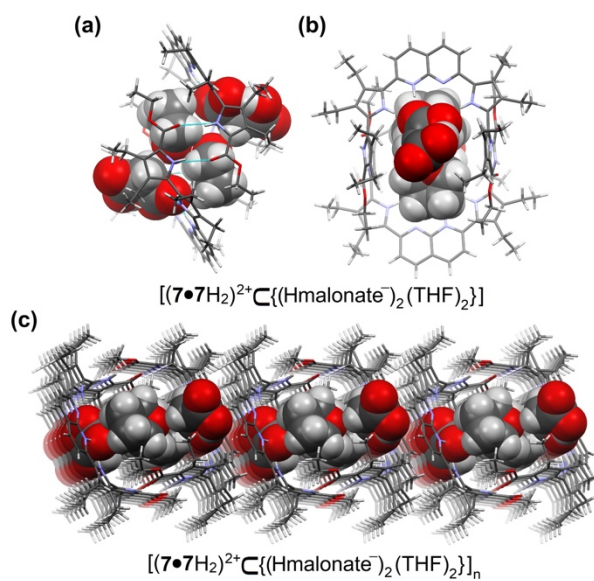

**Figure S59.** (a,b) Single crystal X-ray structure of  $[(7\bullet7H_2)^{2+} \cdot \{(Hmalonate^-)_2(THF)_2\}]$ , showing two encapsulated oxalate anions along with two solvent (THF) molecules inside capsule **7•7**. (c) 3D view of the guests inside the infinite channel formed from capsules **7•7**.

**Table S7.** Crystallographic data and structure refinement parameters for [(7•7H<sub>2</sub>)<sup>2+</sup>⊂{(Hmalonate<sup>-</sup>)<sub>2</sub>(THF)<sub>2</sub>}].

|                                                     |                                                                                                                                                                              |
|-----------------------------------------------------|------------------------------------------------------------------------------------------------------------------------------------------------------------------------------|
| Identification code                                 | 7•7(malonic acid) <sub>2</sub> (THF) <sub>2</sub>                                                                                                                            |
| Empirical formula                                   | C <sub>56</sub> H <sub>77</sub> N <sub>6</sub> O <sub>9</sub>                                                                                                                |
| Formula weight                                      | 978.23                                                                                                                                                                       |
| Temperature                                         | 173(2) K                                                                                                                                                                     |
| Wavelength                                          | 1.54184 Å                                                                                                                                                                    |
| Crystal system                                      | Triclinic                                                                                                                                                                    |
| Space group                                         | P-1                                                                                                                                                                          |
| Unit cell dimensions                                | $a = 11.7856(2) \text{ \AA}$ $\alpha = 68.685(2)^\circ$<br>$b = 15.0499(4) \text{ \AA}$ $\beta = 71.465(3)^\circ$<br>$c = 17.5779(4) \text{ \AA}$ $\gamma = 71.534(2)^\circ$ |
| Volume                                              | 2681.50(12) Å <sup>3</sup>                                                                                                                                                   |
| Z                                                   | 2                                                                                                                                                                            |
| Calculated density                                  | 1.212 g/m <sup>3</sup>                                                                                                                                                       |
| Absorption coefficient                              | 0.661 mm <sup>-1</sup>                                                                                                                                                       |
| F(000)                                              | 1054                                                                                                                                                                         |
| Crystal size                                        | 0.200 × 0.080 × 0.080 mm <sup>3</sup>                                                                                                                                        |
| Theta range for data collection                     | 3.595 to 67.064°                                                                                                                                                             |
| Limiting indices                                    | -14 ≤ <i>h</i> ≤ 14, -17 ≤ <i>k</i> ≤ 17, -20 ≤ <i>l</i> ≤ 20                                                                                                                |
| Reflections collected/unique                        | 63220 / 9511 [ <i>R</i> <sub>int</sub> = 0.0665]                                                                                                                             |
| Completeness to $\theta = 67.064^\circ$             | 99.6%                                                                                                                                                                        |
| Absorption correction                               | Semi-empirical from equivalents                                                                                                                                              |
| Max. and min. transmission                          | 1.000 and 0.72442                                                                                                                                                            |
| Refinement method                                   | Full-matrix least-squares on <i>F</i> <sup>2</sup>                                                                                                                           |
| Data / restraints / parameters                      | 9511 / 40 / 654                                                                                                                                                              |
| Goodness-of-fit on <i>F</i> <sup>2</sup>            | 1.037                                                                                                                                                                        |
| Final <i>R</i> indices [ <i>I</i> > 2σ( <i>I</i> )] | <i>R</i> <sub>1</sub> = 0.0725, <i>wR</i> <sub>2</sub> = 0.1925                                                                                                              |
| <i>R</i> indices (all data)                         | <i>R</i> <sub>1</sub> = 0.0844, <i>wR</i> <sub>2</sub> = 0.2013                                                                                                              |
| Extinction coefficient                              | n/a                                                                                                                                                                          |
| Largest diff. peak and hole                         | 1.362 and -0.733 eÅ <sup>-3</sup>                                                                                                                                            |
| <b>CCDC No 1951163</b>                              |                                                                                                                                                                              |

**X-ray diffraction analysis of single crystals of [(7•7H<sub>2</sub>)<sup>2+</sup>⊂(HSO<sub>4</sub><sup>-</sup>)<sub>2</sub>]:** A single crystal suitable for X-ray analysis was grown from a THF solution of capsule 7•7 in the presence of 100 equiv of H<sub>2</sub>SO<sub>4</sub>, slowly diffused with hexanes. Deep red rod-shaped crystals appeared after approximately seven days. The data were collected on a Bruker

D8 Venture diffractometer with a METALJET GaK $\alpha$  radiation source ( $\lambda = 1.3414 \text{ \AA}$ ). The data were collected at 213 K. The data were collected using  $\phi$ - and  $\omega$ -scans with a scan range of 2.71–52.99° and an exposing time of 3 s per frame. Crystallographic data are listed in the **Table S8**. Data were collected using Bruker APEX III software. Unit cell refinement and data reduction were performed using SAINT V8.378A software.<sup>S5</sup> The structure was solved by direct methods using SHELXT<sup>S6</sup> and refined by full-matrix least-squares on  $F^2$  with anisotropic displacement parameters for the non-H atoms using SHELXL-2018/3. The hydrogen atoms were calculated in ideal positions with a riding mode. SQUEEZE routine was applied by using PLATON<sup>S9</sup> for some electron densities which could not reasonably modeled.

Crystallographic data has been deposited in the Cambridge Crystallographic Data Center with CCDC number: **1951161**. This data can be obtained free of charge at [http://www.ccdc.cam.ac.uk/data\\_request/cif](http://www.ccdc.cam.ac.uk/data_request/cif).

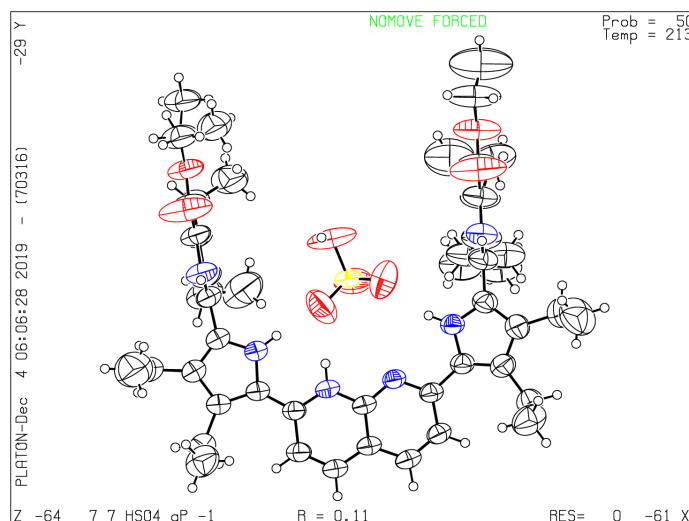

**Figure S60.** Asymmetric unit of  $[(7.7H_2)^{2+}(HSO_4^-)_2]$  obtained from a single crystal X-ray diffraction analysis. The thermal ellipsoids are scaled to the 30% probability level.

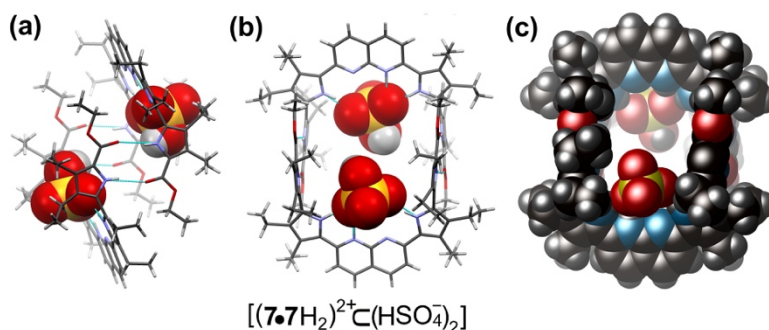

**Figure S61.** (a,b) Two different views of the single crystal X-ray structure of [(7•7H<sub>2</sub>)<sup>2+</sup>⊂(HSO<sub>4</sub><sup>-</sup>)<sub>2</sub>], showing two encapsulated sulfate anions inside the capsule. (c) The space-filling model of encapsulated guests inside the capsule.

**Table S8.** Crystallographic data and structure refinement parameters for [(7•7H<sub>2</sub>)<sup>2+</sup>⊂(HSO<sub>4</sub><sup>-</sup>)<sub>2</sub>].

|                                         |                                                                 |                            |
|-----------------------------------------|-----------------------------------------------------------------|----------------------------|
| Identification code                     | 7•7(H <sub>2</sub> SO <sub>4</sub> ) <sub>2</sub>               |                            |
| Empirical formula                       | C <sub>46</sub> H <sub>58</sub> N <sub>6</sub> O <sub>8</sub> S |                            |
| Formula weight                          | 855.04                                                          |                            |
| Temperature                             | 213(2) K                                                        |                            |
| Wavelength                              | 1.34139 Å                                                       |                            |
| Crystal system                          | Triclinic                                                       |                            |
| Space group                             | P-1                                                             |                            |
| Unit cell dimensions                    | $a = 11.9458(5) \text{ \AA}$                                    | $\alpha = 76.623(2)^\circ$ |
|                                         | $b = 15.1939(5) \text{ \AA}$                                    | $\beta = 88.347(2)^\circ$  |
|                                         | $c = 16.5538(6) \text{ \AA}$                                    | $\gamma = 73.614(2)^\circ$ |
| Volume                                  | 2802.19(18) Å <sup>3</sup>                                      |                            |
| Z                                       | 2                                                               |                            |
| Calculated density                      | 1.013 g/m <sup>3</sup>                                          |                            |
| Absorption coefficient                  | 0.583 mm <sup>-1</sup>                                          |                            |
| F(000)                                  | 912                                                             |                            |
| Crystal size                            | 0.160 × 0.110 × 0.090 mm <sup>3</sup>                           |                            |
| Theta range for data collection         | 2.712 to 52.990°                                                |                            |
| Limiting indices                        | -14 ≤ h ≤ 14, -18 ≤ k ≤ 15, -19 ≤ l ≤ 19                        |                            |
| Reflections collected                   | 37633                                                           |                            |
| Independent reflections                 | 9864 [ $R_{\text{int}} = 0.0560$ ]                              |                            |
| Completeness to $\theta = 52.990^\circ$ | 99.6%                                                           |                            |
| Absorption correction                   | Semi-empirical from equivalents                                 |                            |
| Max. and min. transmission              | 1.000000 and 0.872442                                           |                            |
| Refinement method                       | Full-matrix least-squares on $F^2$                              |                            |
| Data / restraints / parameters          | 9864 / 495 / 529                                                |                            |

|                                        |                                      |
|----------------------------------------|--------------------------------------|
| Goodness-of-fit on $F^2$               | 1.077                                |
| Final $R$ indices [ $I > 2\sigma(I)$ ] | $R_1 = 0.1152$ , $wR_2 = 0.2274$     |
| $R$ indices (all data)                 | $R_1 = 0.1592$ , $wR_2 = 0.2482$     |
| Extinction coefficient                 | n/a                                  |
| Largest diff. peak and hole            | 0.839 and -0.693 e $\text{\AA}^{-3}$ |
| <b>CCDC No 1951161</b>                 |                                      |

## C. References

- S1. Setsune, J.-I.; Toda, M.; Watanabe, K.; Panda, P. K.; Yoshida, T., Synthesis of bis (pyrrol-2-yl) arenes by Pd-catalyzed cross coupling. *Tetrahedron Lett.*, **2006**, *47*, 7541–7544.
- S2. Setsune, J.-I.; Watanabe, K., Cryptand-like porphyrinoid assembled with three dipyrrolylpyridine chains: synthesis, structure, and homotropic positive allosteric binding of carboxylic acids. *J. Am. Chem. Soc.*, **2008**, *130*, 2404–2405.
- S3. Zhang, Z.; Lim, J. M.; Ishida, M.; Roznyatovskiy, V. V.; Lynch, V. M.; Gong, H. Y.; Yang, X.; Kim, D.; Sessler, J. L., Cyclo[m]pyridine[n]pyrroles: hybrid macrocycles that display expanded  $\pi$ -conjugation upon protonation. *J. Am. Chem. Soc.*, **2012**, *134*, 4076–4079.
- S4. <http://www.supramolecular.org>.
- S5. Bruker SADABS, SMART and SAINT. Bruker AXS Inc., Madison, Wisconsin, USA, **2017**.
- S6. Sheldrick, G. M., SHELXT-integrated space-group and crystal-structure determination. *Acta Cryst. A*, **2015**, *71*, 3–8.
- S7. Kabsch, W. *J. Appl. Crystallogr.*, **1993**, *26*, 795–800.
- S8. Otwinowski, Z.; Minor, W. “*Processing of X-ray Diffraction Data Collected in Oscillation Mode*”, *Methods in Enzymology*, Vol. 276: Macromolecular Crystallography, Part A, pp. 307–326, **1997**, Carter, Jr. C. W. and Sweet, R. M. Eds., Academic Press.
- S9. Spek, A. L., PLATON SQUEEZE: A tool for the calculation of the disordered solvent contribution to the calculated structure factors. *Acta Cryst. C*, **2015**, *71*, 9–18.
- S10. CrysAlisPro. Agilent Technologies (2013). Agilent Technologies UK Ltd., Oxford, UK, SuperNova CCD System, CrysAlisPro Software System, 1.171.39.46.
